# Supplementary material
Source: publisher figshare collection journal article supplement (https://plos.figshare.com/articles/dataset/_/5169694)
Supplement: Supplementary file 1 [file 1]

Archive with 4 entries (4 files):
- pone.0180555.s001.pdf
- pone.0180555.s002.pdf
- pone.0180555.s003.xlsx
- pone.0180555.s004.pdf
