# Supplementary material
Source: publisher figshare collection journal article supplement (https://plos.figshare.com/articles/dataset/_/5169694)
Supplement: Supplementary file 1 [file 1 › pone.0180555.s001.pdf]

Supplementary analysis information for **Performance of the SD BIOLINE® HAT rapid test in various diagnostic algorithms for *gambiense* human African trypanosomiasis in the Democratic Republic of the Congo**

Crispin Lumbala, Paul R. Bessell, Pascal Lutumba, Sylvain Baloji, Sylvain Biéler, Joseph M. Ndung'u

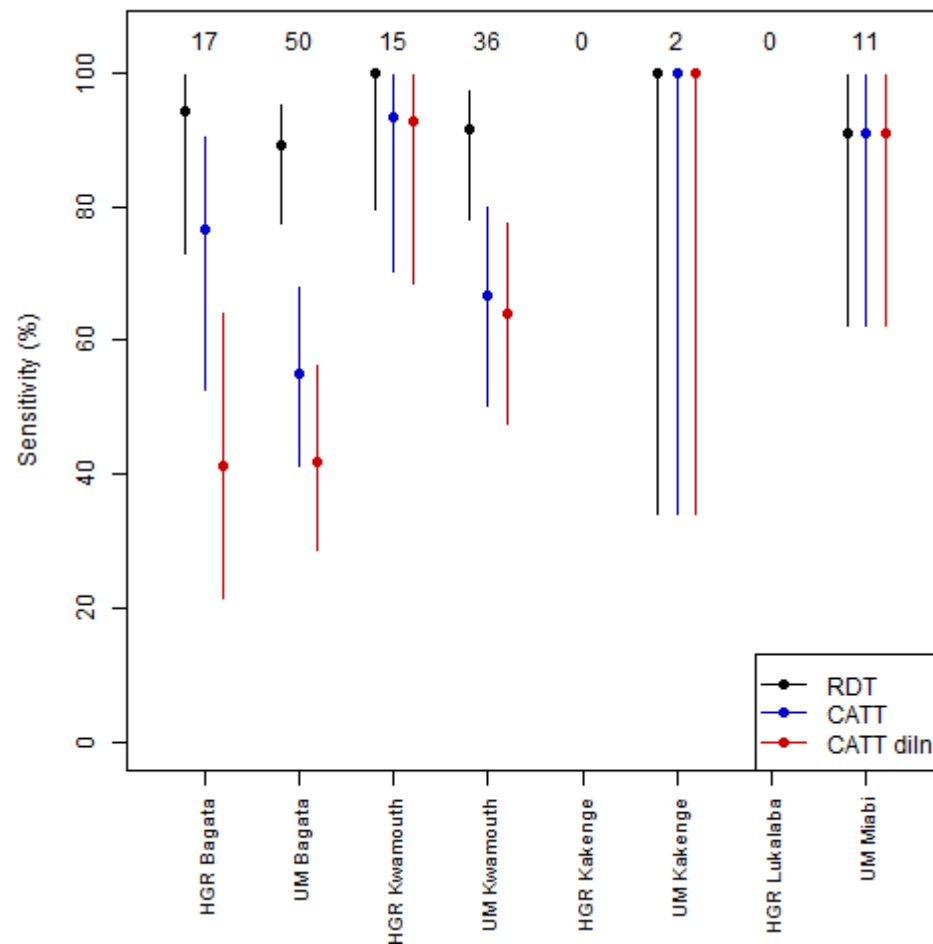

Fig S1. Sensitivity by screening facility. Lines represent the 95% CIs. Numbers at the top are the number screened in each group. HGR = Reference hospital; UM = Mobile team.

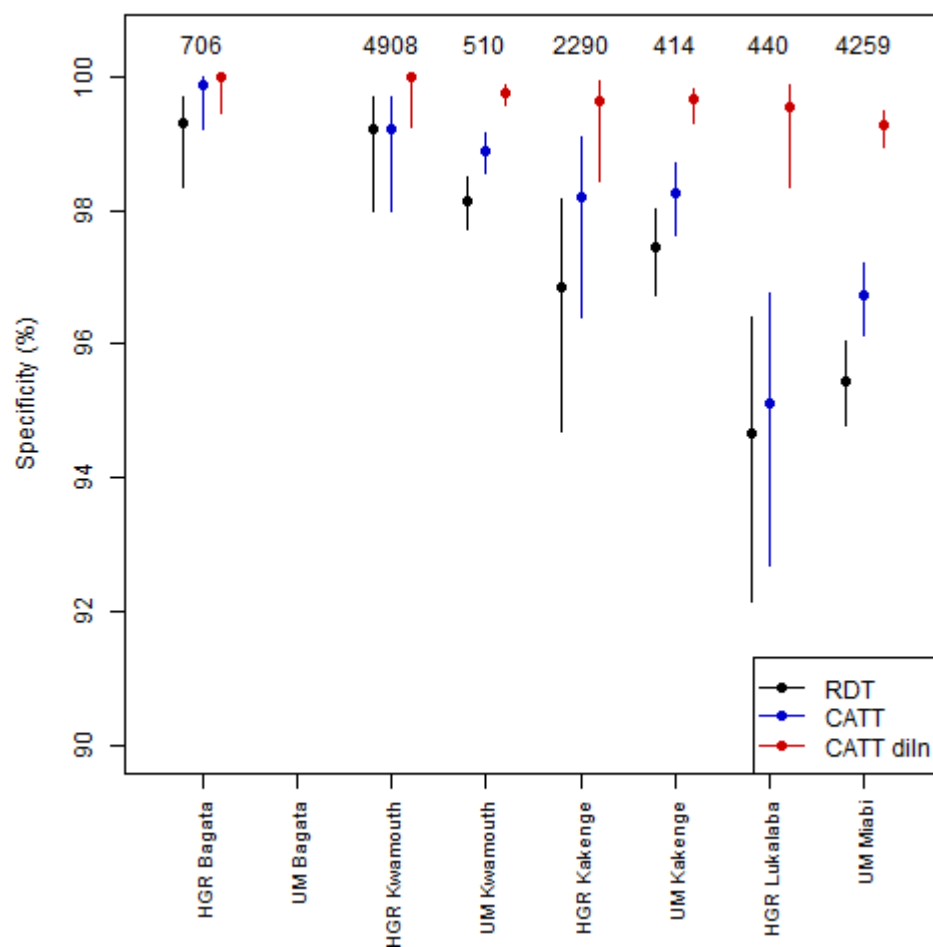

Fig S2. Specificity by screening facility. Lines represent the 95% CIs. Numbers at the top are the number screened in each group. Note the x-axis scale is 0-90%. HGR = Reference hospital; UM = Mobile team.

|                      | Number of cases | Reader 1- borderline |          | Reader 2 - borderline |          |
|----------------------|-----------------|----------------------|----------|-----------------------|----------|
|                      |                 | CATT Negative        | Positive | Negative              | Positive |
| Bagata Hospital      | 17              | 0                    | 4        | 0                     | 5        |
| Bagata Mobile team   | 50              | 5                    | 4        | 6                     | 6        |
| Kwamouth Hospital    | 15              | 0                    | 0        | 0                     | 0        |
| Kwamouth Mobile team | 36              | 0                    | 0        | 0                     | 0        |
| Kakege Hospital      | 0               | 0                    | 0        | 0                     | 0        |
| Kakege Mobile team   | 2               | 0                    | 0        | 0                     | 0        |
| Lukalaba Hospital    | 0               | 0                    | 0        | 0                     | 0        |
| Miabi Mobile team    | 11              | 0                    | 0        | 0                     | 0        |

Table S1. Borderline CATT results amongst cases by unit screening.
