# Supplementary material
Source: publisher figshare collection journal article supplement (https://plos.figshare.com/articles/dataset/_/5169694)
Supplement: Supplementary file 1 [file 1 › pone.0180555.s003.xlsx]

## Sheet: Columns
Column	Description
Enrolment_date	Date of enrolment
Sex	Sex of enroled perosn
Age	Age of enroled person
Malaria_RDT_result	Result of malaria RDT
CTC_done	Was CTC done?
CTC_result	CTC result
CSF_done	Was CSF done
CSF_result	CSF result
CSF_WBC	White blood cell count
LP_done	Was lymph node palpation performed
LP_result	Lymph node aspitation result
mAECT_done	Was mAECT done?
mAECT_result	mAECT result
CATT_fresh_read1	CATT results reader 1
CATT_fresh_read2	CATT results reader 2
CATTdiln_done	Was CATT dilution done reader 1
CATT_diln	CATT diluton result reader 1
CATTdiln_done_read2	Was CATT dilution done reader 2
CATTdiln_read2	CATT diluton result reader 2
RDTfresh_read1	RDT result reader 1
RDTfresh_read2	RDT result reader 2
RDTfresh_B1_read1	RDT band 1 intensity reader 1
RDTfresh_B1_read2	RDT band 1 intensity reader 2
RDTfresh_B2_read1	RDT band 2 intensity reader 1
RDTfresh_B2_read2	RDT band 2 intensity reader 2
Facility	Facility performing the tests
Type	Type of facility

## Sheet: RDT_Demo_Data
Enrolment_date	Sex	Age	Malaria_RDT_result	CTC_done	CTC_result	CSF_done	CSF_result	CSF_WBC	LP_done	LP_result	mAECT_done	mAECT_result	CATT_fresh_read1	CATT_fresh_read2	CATTdiln_done	CATT_diln	CATTdiln_done_read2	CATTdiln_read2	RDTfresh_read1	RDTfresh_read2	RDTfresh_B1_read1	RDTfresh_B1_read2	RDTfresh_B2_read1	RDTfresh_B2_read2	Facility	Type
2013-05-02	Male	26	Neg	Done	Pos	Done	Neg	5	Not done		Done	Neg	Pos	Pos	Done	Neg	Done	Neg	Neg	Neg	0	0	0	0	HGR Bagata	Fixed
2013-05-03	Female	30	Neg	Done	Neg	Done	Neg	10	Not done		Done	Pos	Pos	Pos	Done	Neg	Done	Neg	Pos	Pos	2+	1+	2+	2+	HGR Bagata	Fixed
2013-05-10	Female	29	Pos	Done	Pos	Not done			Not done		Done	Neg	Pos	Pos	Done	Neg	Done	Neg	Pos	Pos	2+	2+	2+	2+	HGR Bagata	Fixed
2013-05-23	Female	41	Neg	Done	Neg	Not done			Not done		Done	Neg	Neg	Neg	Done	Neg	Done	Neg	Pos	Pos	0	0	1+	1+	HGR Bagata	Fixed
2013-06-01	Female	12	Neg	Done	Neg	Done	Neg	3	Done	Pos	Done	Neg	Pos	Pos	Done	Neg	Done	Neg	Pos	Pos	2+	1+	2+	2+	HGR Bagata	Fixed
2013-06-06	Female	26	Neg	Done	Pos	Done	Neg	2	Not done		Done	Neg	Neg	Neg	Not done		Not done		Pos	Pos	2+	2+	2+	2+	HGR Bagata	Fixed
2013-06-17	Female	52	Neg	Done	Neg	Done	Neg	5	Not done		Done	Pos	Neg	Neg	Not done		Not done		Pos	Pos	0	0	1+	1+	HGR Bagata	Fixed
2013-06-18	Female	15	Pos	Done	Neg	Done	Neg	3	Not done		Done	Pos	Pos	Pos	Done	Pos	Done	Pos	Pos	Pos	2+	1+	2+	2+	HGR Bagata	Fixed
2013-06-17	Female	20	Neg	Done	Neg	Not done			Not done		Done	Neg	Neg	Neg	Not done		Not done		Pos	Pos	1+	1+	1+	1+	HGR Bagata	Fixed
2013-06-18	Female	58	Neg	Done	Neg	Not done			Not done		Done	Neg	Neg	Neg	Not done		Not done		Pos	Pos	2+	1+	2+	1+	HGR Bagata	Fixed
2013-06-18	Male	35	Neg	Done	Pos	Not done			Not done		Done	Neg	Pos	Pos	Done	Pos	Done	Pos	Pos	Pos	1+	1+	1+	1+	HGR Bagata	Fixed
2013-06-26	Female	13	Neg	Done	Neg	Done	Neg	3	Not done		Done	Pos	Pos	Pos	Done	Neg	Done	Neg	Pos	Pos	2+	2+	0	0	HGR Bagata	Fixed
2013-07-05	Male	44	Neg	Done	Pos	Done	Neg	12	Not done		Done	Pos	Pos	Pos	Done	Pos	Done	Pos	Pos	Pos	2+	0	1+	1+	HGR Bagata	Fixed
2013-07-13	Male	44	Pos	Done	Pos	Done	Neg	4	Not done		Done	Neg	Neg	Neg	Not done		Not done		Pos	Pos	0	0	1+	1+	HGR Bagata	Fixed
2013-07-26	Female	33	Neg	Done	Neg	Done	Pos	585	Not done		Done	Neg	Pos	Pos	Done	Neg	Done	Neg	Pos	Pos	2+	2+	1+	1+	HGR Bagata	Fixed
2013-07-22	Female	4	Neg	Done	Neg	Not done			Not done		Done	Neg	Pos	Pos	Done	Neg	Done	Neg	Neg	Neg	0	0	0	0	HGR Bagata	Fixed
2013-07-25	Female	37	Neg	Done	Neg	Not done			Not done		Done	Neg	Neg	Neg	Not done		Not done		Pos	Pos	1+	2+	2+	1+	HGR Bagata	Fixed
2013-07-25	Female	45	Neg	Done	Neg	Not done			Not done		Done	Neg	Neg	Neg	Done	Neg	Done	Neg	Pos	Pos	1+	1+	0	0	HGR Bagata	Fixed
2013-07-26	Male	56	Neg	Done	Pos	Done	Neg	2	Not done		Done	Neg	Pos	Pos	Done	Pos	Done	Pos	Pos	Pos	1+	1+	2+	2+	HGR Bagata	Fixed
2013-08-12	Female	32	Pos	Done	Neg	Not done			Not done		Not done		Pos	Pos	Done	Pos	Done	Pos	Neg	Neg	0	0	0	0	HGR Bagata	Fixed
2013-08-01	Female	19	Pos	Done	Pos	Done	Neg	3	Not done		Done	Neg	Pos	Pos	Done	Pos	Done	Pos	Pos	Pos	2+	2+	1+	1+	HGR Bagata	Fixed
2013-08-01	Female	47	Pos	Done	Pos	Done	Neg	8	Not done		Not done		Pos	Pos	Done	Pos	Done	Pos	Pos	Pos	2+	2+	1+	1+	HGR Bagata	Fixed
2013-08-01	Female	0	Neg	Done	Pos	Done	Neg	13	Not done		Done	Pos	Pos	Pos	Done	Pos	Done	Pos	Pos	Pos	1+	1+	2+	2+	HGR Bagata	Fixed
2013-08-09	Male	27	Neg	Done	Neg	Done	Pos	125	Not done		Not done		Neg	Neg	Not done		Not done		Pos	Pos	0	0	3+	3+	HGR Bagata	Fixed
2013-08-12	Female	24	Neg	Not done		Not done			Not done		Not done		Pos	Pos	Not done		Not done		Pos	Pos	2+	2+	2+	2+	HGR Bagata	Fixed
2013-08-13	Male	66	Neg	Not done		Not done			Not done		Not done		Neg	Neg	Not done		Not done		Pos	Pos	1+	1+	0	0	HGR Bagata	Fixed
2013-06-01	Female	2	Neg	Done	Neg	Done	Neg	3	Not done		Done	Pos	Pos	Pos	Done	Pos	Done	Pos	Pos	Pos	1+	1+	2+	2+	UM Bagata	Mobile
2013-07-22	Female	9	Not done	Not done		Done	Neg	4	Done	Pos	Not done		Pos	Pos	Done	Pos	Done	Pos	Pos	Pos	3+	3+	3+	3+	UM Bagata	Mobile
2013-07-22	Male	26	Neg	Not done		Done	Neg	3	Done	Pos	Not done		Pos	Pos	Done	Pos	Done	Pos	Pos	Pos	3+	3+	3+	3+	UM Bagata	Mobile
2013-07-23	Male	22	Neg	Done	Pos	Done	Neg	5	Done	Neg	Done	Pos	Pos	Neg	Not done		Not done		Pos	Pos	1+	1+	2+	2+	UM Bagata	Mobile
2013-07-24	Male	34	Neg	Not done		Done	Neg	1	Done	Pos	Not done		Pos	Pos	Done	Pos	Done	Pos	Pos	Pos	3+	3+	3+	3+	UM Bagata	Mobile
2013-07-25	Female	28	Neg	Not done		Done	Neg	1	Done	Pos	Not done		Pos	Pos	Done	Pos	Done	Pos	Pos	Pos	3+	2+	3+	3+	UM Bagata	Mobile
2013-07-26	Female	38	Neg	Done	Neg	Done	Neg	4	Done	Pos	Done	Neg	Pos	Pos	Done	Neg	Done	Neg	Pos	Pos	0	0	4+	4+	UM Bagata	Mobile
2013-07-26	Male	26	Not done	Not done		Done	Neg	4	Not done		Done	Pos	Pos	Pos	Done	Pos	Done	Pos	Pos	Pos	0	0	2+	2+	UM Bagata	Mobile
2013-07-26	Female	1	Neg	Done	Neg	Done	Neg	2	Not done		Done	Pos	Pos	Pos	Done	Pos	Done	Pos	Pos	Pos	3+	0	3+	3+	UM Bagata	Mobile
2013-07-26	Male	13	Neg	Done	Pos	Done	Neg	2	Not done		Not done		Pos	Pos	Done	Pos	Done	Pos	Neg	Neg	0	0	0	0	UM Bagata	Mobile
2013-07-27	Female	50	Neg	Done	Neg	Done	Neg	2	Done	Pos	Done	Neg	Neg	Neg	Not done		Not done		Pos	Pos	4+	2+	3+	3+	UM Bagata	Mobile
2013-07-26	Female	13	Neg	Not done		Done	Neg	10	Done	Pos	Not done		Pos	Pos	Done	Pos	Done	Pos	Neg	Neg	0	0	0	0	UM Bagata	Mobile
2013-07-27	Male	13	Neg	Done	Neg	Done	Neg	2	Not done		Done	Pos	Pos	Pos	Done	Pos	Done	Pos	Pos	Pos	3+	2+	2+	2+	UM Bagata	Mobile
2013-07-30	Male	16	Neg	Done	Neg	Done	Neg	2	Not done		Done	Pos	Neg	Neg	Not done		Not done		Pos	Pos	2+	1+	0	0	UM Bagata	Mobile
2013-07-31	Female	81	Neg	Done	Neg	Done	Neg	3	Not done		Done	Pos	Pos	Pos	Done	Pos	Done	Pos	Neg	Neg	0	0	0	0	UM Bagata	Mobile
2013-08-02	Male	10	Not done	Not done		Done	Neg	10	Done	Pos	Not done		Pos	Pos	Done	Pos	Done	Pos	Pos	Pos	3+	1+	2+	2+	UM Bagata	Mobile
2013-08-02	Female	65	Not done	Done	Pos	Done	Neg	3	Not done		Not done		Pos	Pos	Done	Pos	Done	Pos	Pos	Pos	2+	2+	4+	0	UM Bagata	Mobile
2013-08-02	Male	11	Not done	Not done		Done	Neg	4	Not done		Done	Pos	Neg	Neg	Not done		Not done		Pos	Pos	2+	0	0	2+	UM Bagata	Mobile
2013-08-02	Male	2	Not done	Done	Pos	Done	Neg	2	Not done		Not done		Neg	Neg	Not done		Not done		Pos	Pos	2+	2+	2+	1+	UM Bagata	Mobile
2013-08-02	Female	9	Neg	Not done		Done	Neg	3	Done	Pos	Not done		Pos	Pos	Done	Pos	Done	Pos	Pos	Pos	3+	2+	3+	2+	UM Bagata	Mobile
2013-08-02	Female	49	Neg	Done	Pos	Done	Neg	9	Not done		Not done		Neg	Neg	Not done		Not done		Pos	Pos	0	2+	2+	0	UM Bagata	Mobile
2013-08-02	Male	39	Not done	Done	Neg	Done	Neg	3	Not done		Done	Pos	Pos	Pos	Done	Pos	Done	Pos	Pos	Pos	2+	1+	2+	2+	UM Bagata	Mobile
2013-08-02	Female	8	Not done	Done	Pos	Done	Neg	2	Done	Neg	Not done		Neg	Neg	Not done		Not done		Pos	Neg	2+	0	0	0	UM Bagata	Mobile
2013-08-02	Female	12	Neg	Done	Neg	Done	Neg	1	Done	Neg	Done	Pos	Neg	Neg	Not done		Not done		Pos	Pos	1+	1+	2+	2+	UM Bagata	Mobile
2013-08-03	Male	28	Not done	Not done		Done	Neg	1	Done	Pos	Not done		Pos	Pos	Done	Pos	Done	Pos	Pos	Pos	2+	3+	2+	2+	UM Bagata	Mobile
2013-08-04	Male	25	Not done	Not done		Done	Pos	268	Done	Pos	Not done		Pos	Pos	Not done		Not done		Pos	Pos	3+	2+	2+	2+	UM Bagata	Mobile
2013-08-07	Female	28	Not done	Not done		Done	Neg	4	Done	Pos	Not done		Pos	Pos	Done	Pos	Done	Pos	Pos	Pos	3+	2+	4+	3+	UM Bagata	Mobile
2013-08-07	Female	24	Not done	Done	Neg	Done	Neg	2	Done	Neg	Done	Neg	Pos	Pos	Done	Pos	Done	Pos	Pos	Pos	3+	3+	2+	0	UM Bagata	Mobile
2013-08-08	Female	23	Pos	Not done		Done	Neg	3	Done	Pos	Not done		Pos	Pos	Done	Pos	Done	Pos	Pos	Pos	3+	3+	2+	2+	UM Bagata	Mobile
2013-08-08	Female	28	Not done	Done	Neg	Done	Neg	1	Not done		Done	Pos	Neg	Neg	Not done		Not done		Pos	Pos	3+	2+	2+	2+	UM Bagata	Mobile
2013-08-08	Male	1	Not done	Done	Neg	Done	Neg	1	Done	Neg	Done	Pos	Neg	Neg	Not done		Not done		Pos	Pos	3+	2+	2+	0	UM Bagata	Mobile
2013-08-27	Male	29	Not done	Done	Pos	Done	Neg	2	Not done		Not done		Pos	Pos	Done	Pos	Done	Pos	Neg	Neg	0	0	0	0	UM Bagata	Mobile
2013-08-28	Male	33	Not done	Done	Pos	Done	Neg	4	Done	Neg	Not done		Neg	Neg	Not done		Not done		Pos	Pos	3+	3+	2+	2+	UM Bagata	Mobile
2013-08-30	Male	28	Neg	Done	Neg	Done	Neg	1	Not done		Done	Pos	Pos	Pos	Done	Neg	Done	Neg	Neg	Neg	0	0	0	0	UM Bagata	Mobile
2013-08-30	Female	8	Neg	Not done		Done	Neg	1	Done	Pos	Not done		Pos	Pos	Done	Neg	Done	Neg	Pos	Pos	2+	2+	3+	3+	UM Bagata	Mobile
2013-09-20	Female	4	Not done	Done	Pos	Done	Neg	3	Done	Neg	Not done		Neg	Neg	Not done		Not done		Pos	Pos	2+	2+	2+	2+	UM Bagata	Mobile
2013-09-20	Female	25	Not done	Done	Pos	Done	Neg	2	Done	Neg	Not done		Neg	Neg	Not done		Not done		Pos	Pos	2+	2+	1+	1+	UM Bagata	Mobile
2013-09-20	Male	13	Pos	Done	Neg	Done	Neg	3	Not done		Done	Pos	Neg	Neg	Not done		Not done		Pos	Pos	2+	2+	2+	2+	UM Bagata	Mobile
2013-09-22	Female	12	Not done	Done	Pos	Done	Neg	4	Not done		Not done		Neg	Neg	Not done		Not done		Pos	Pos	2+	2+	1+	1+	UM Bagata	Mobile
2013-09-22	Male	15	Not done	Done	Pos	Done	Neg	4	Done	Pos	Not done		Neg	Neg	Not done		Not done		Pos	Pos	2+	2+	1+	1+	UM Bagata	Mobile
2013-09-22	Female	7	Not done	Done	Pos	Done	Neg	2	Not done		Not done		Neg	Neg	Not done		Not done		Pos	Pos	2+	2+	0	0	UM Bagata	Mobile
2013-10-02	Male	13	Neg	Not done		Done	Neg	5	Done	Pos	Not done		Pos	Pos	Not done		Not done		Pos	Pos	3+	2+	3+	2+	UM Bagata	Mobile
2013-10-03	Female	49	Not done	Done	Neg	Done	Neg	4	Not done		Done	Pos	Neg	Neg	Not done		Not done		Pos	Pos	2+	0	2+	0	UM Bagata	Mobile
2013-10-03	Female	23	Not done	Not done		Done	Neg	3	Not done		Done	Pos	Neg	Neg	Not done		Not done		Pos	Pos	2+	0	0	0	UM Bagata	Mobile
2013-10-04	Male	25	Neg	Done	Pos	Done	Neg	5	Not done		Not done		Neg	Neg	Not done		Not done		Pos	Pos	0	0	2+	2+	UM Bagata	Mobile
2013-10-04	Female	34	Not done	Done	Pos	Done	Neg	4	Not done		Not done		Pos	Pos	Not done		Not done		Pos	Pos	2+	2+	2+	2+	UM Bagata	Mobile
2013-10-04	Male	40	Not done	Not done		Done	Neg	4	Done	Pos	Not done		Neg	Neg	Not done		Not done		Pos	Pos	0	0	2+	2+	UM Bagata	Mobile
2013-10-07	Female	18	Neg	Not done		Done	Neg	3	Done	Pos	Not done		Pos	Pos	Not done		Not done		Pos	Pos	3+	2+	2+	2+	UM Bagata	Mobile
2013-10-06	Female	27	Not done	Not done		Done	Neg	4	Not done		Done	Pos	Pos	Pos	Done	Neg	Done	Neg	Pos	Pos	2+	2+	2+	2+	UM Bagata	Mobile
2013-10-07	Male	56	Not done	Done	Neg	Done	Neg	2	Not done		Done	Pos	Neg	Neg	Not done		Not done		Pos	Pos	2+	2+	2+	2+	UM Bagata	Mobile
2013-10-07	Male	34	Neg	Done	Neg	Done	Neg	3	Not done		Done	Pos	Neg	Neg	Not done		Not done		Pos	Pos	2+	2+	2+	2+	UM Bagata	Mobile
2013-04-28	Male	23	Not done	Done	Neg	Not done			Not done		Done	Neg	Pos	Pos	Done	Pos	Done	Pos	Pos	Pos	0	0	1+	1+	UM Kwamouth	Mobile
2013-04-28	Male	10	Pos	Done	Neg	Not done			Done	Neg	Done	Neg	Neg	Neg	Not done		Not done		Pos	Pos	1+	1+	1+	1+	UM Kwamouth	Mobile
2013-04-28	Male	8	Pos	Done	Neg	Done	Neg	3	Not done		Done	Pos	Pos	Pos	Done	Pos	Done	Pos	Pos	Pos	1+	1+	1+	1+	UM Kwamouth	Mobile
2013-04-30	Female	52	Neg	Done	Neg	Not done			Not done		Done	Neg	Neg	Neg	Not done		Not done		Pos	Pos	0	0	1+	1+	UM Kwamouth	Mobile
2013-05-02	Male	13	Pos	Done	Neg	Not done			Done	Neg	Done	Neg	Neg	Neg	Not done		Not done		Pos	Pos	1+	1+	0	0	UM Kwamouth	Mobile
2013-05-03	Male	18	Neg	Done	Neg	Not done			Not done		Done	Neg	Neg	Neg	Not done		Not done		Pos	Pos	0	0	1+	1+	UM Kwamouth	Mobile
2013-05-03	Female	22	Neg	Done	Neg	Done	Neg	3	Done	Neg	Done	Pos	Neg	Neg	Not done		Not done		Pos	Pos	0	0	1+	1+	UM Kwamouth	Mobile
2013-05-02	Male	30	Neg	Done	Neg	Not done			Done	Neg	Done	Neg	Neg	Neg	Not done		Not done		Pos	Pos	0	1+	1+	1+	UM Kwamouth	Mobile
2013-05-27	Female	28	Neg	Done	Neg	Done	Pos	500	Not done		Done	Pos	Pos	Pos	Done	Pos	Done	Pos	Pos	Pos	0	0	1+	1+	UM Kwamouth	Mobile
2013-05-27	Male	12	Pos	Done	Pos	Done	Pos	300	Not done		Not done		Pos	Pos	Done	Pos	Done	Pos	Pos	Pos	0	0	2+	2+	UM Kwamouth	Mobile
2013-05-28	Male	14	Pos	Done	Neg	Not done			Done	Neg	Done	Neg	Pos	Pos	Done	Neg	Done	Neg	Neg	Neg	0	0	0	0	UM Kwamouth	Mobile
2013-05-28	Female	13	Pos	Done	Neg	Not done			Not done		Done	Neg	Neg	Neg	Not done		Not done		Pos	Pos	0	0	1+	1+	UM Kwamouth	Mobile
2013-05-28	Female	15	Pos	Done	Neg	Not done			Not done		Done	Neg	Pos	Pos	Done	Neg	Done	Neg	Neg	Neg	0	0	0	0	UM Kwamouth	Mobile
2013-05-28	Male	18	Neg	Done	Pos	Done	Pos	200	Done	Neg	Not done		Neg	Neg	Done	Pos	Done	Pos	Pos	Pos	0	0	2+	3+	UM Kwamouth	Mobile
2013-05-29	Female	12	Pos	Done	Neg	Not done			Not done		Done	Neg	Neg	Neg	Not done		Not done		Pos	Pos	1+	1+	1+	1+	UM Kwamouth	Mobile
2013-05-29	Male	18	Pos	Done	Neg	Not done			Not done		Done	Pos	Neg	Neg	Not done		Not done		Pos	Pos	0	0	1+	1+	UM Kwamouth	Mobile
2013-05-29	Male	18	Pos	Done	Neg	Not done			Not done		Done	Neg	Pos	Pos	Done	Neg	Done	Neg	Neg	Neg	0	0	0	0	UM Kwamouth	Mobile
2013-05-30	Male	49	Pos	Done	Neg	Not done			Not done		Done	Neg	Pos	Pos	Done	Neg	Done	Neg	Pos	Pos	1+	1+	0	0	UM Kwamouth	Mobile
2013-05-30	Male	23	Neg	Done	Neg	Not done			Not done		Done	Neg	Neg	Neg	Not done		Not done		Pos	Pos	0	0	1+	1+	UM Kwamouth	Mobile
2013-05-30	Male	70	Pos	Done	Neg	Not done			Not done		Done	Neg	Pos	Pos	Done	Neg	Done	Neg	Pos	Pos	1+	1+	0	0	UM Kwamouth	Mobile
2013-05-30	Male	10	Pos	Done	Neg	Not done			Not done		Done	Neg	Pos	Pos	Done	Neg	Done	Neg	Neg	Neg	0	0	0	0	UM Kwamouth	Mobile
2013-05-30	Female	8	Neg	Done	Neg	Not done			Not done		Done	Neg	Pos	Pos	Done	Neg	Done	Neg	Pos	Pos	0	0	2+	2+	UM Kwamouth	Mobile
2013-05-30	Male	7	Pos	Done	Pos	Done	Neg	15	Done	Neg	Not done		Pos	Pos	Done	Pos	Done	Pos	Neg	Neg	0	0	0	0	UM Kwamouth	Mobile
2013-05-30	Female	35	Pos	Done	Neg	Not done			Not done		Done	Neg	Neg	Neg	Not done		Not done		Pos	Pos	2+	2+	2+	2+	UM Kwamouth	Mobile
2013-05-30	Female	13	Pos	Done	Neg	Not done			Not done		Done	Neg	Pos	Pos	Done	Neg	Done	Neg	Pos	Pos	2+	3+	2+	2+	UM Kwamouth	Mobile
2013-05-31	Male	11	Pos	Done	Neg	Not done			Not done		Done	Neg	Pos	Pos	Done	Neg	Done	Neg	Pos	Pos	0	0	1+	1+	UM Kwamouth	Mobile
2013-05-31	Female	13	Pos	Done	Neg	Not done			Done	Neg	Done	Pos	Pos	Pos	Done	Pos	Done	Pos	Pos	Pos	0	0	2+	2+	UM Kwamouth	Mobile
2013-05-31	Female	13	Neg	Done	Neg	Not done			Not done		Done	Neg	Pos	Pos	Done	Neg	Done	Neg	Pos	Pos	1+	1+	2+	2+	UM Kwamouth	Mobile
2013-05-31	Female	16	Pos	Done	Neg	Not done			Not done		Done	Neg	Neg	Neg	Not done		Not done		Pos	Pos	2+	2+	0	0	UM Kwamouth	Mobile
2013-06-01	Female	8	Neg	Done	Neg	Not done			Not done		Done	Neg	Pos	Pos	Done	Neg	Done	Neg	Neg	Neg	0	0	0	0	UM Kwamouth	Mobile
2013-06-01	Female	8	Neg	Done	Neg	Not done			Not done		Done	Neg	Pos	Pos	Done	Neg	Done	Neg	Neg	Neg	0	0	0	0	UM Kwamouth	Mobile
2013-06-01	Male	53	Pos	Done	Neg	Not done			Not done		Done	Pos	Pos	Pos	Done	Pos	Done	Pos	Pos	Pos	2+	2+	2+	2+	UM Kwamouth	Mobile
2013-06-03	Male	14	Pos	Done	Pos	Not done			Not done		Not done		Pos	Pos	Done	Pos	Done	Pos	Pos	Pos	0	0	1+	1+	UM Kwamouth	Mobile
2013-06-03	Female	18	Neg	Done	Neg	Not done			Not done		Done	Neg	Pos	Pos	Done	Neg	Done	Neg	Pos	Pos	0	0	1+	1+	UM Kwamouth	Mobile
2013-06-03	Male	5	Neg	Done	Pos	Done	Neg	4	Not done		Not done		Pos	Pos	Done	Pos	Done	Pos	Neg	Neg	0	0	0	0	UM Kwamouth	Mobile
2013-06-03	Female	29	Pos	Done	Neg	Not done			Not done		Done	Neg	Neg	Neg	Not done		Not done		Pos	Pos	0	0	2+	2+	UM Kwamouth	Mobile
2013-06-04	Female	19	Pos	Done	Neg	Not done			Not done		Done	Neg	Neg	Neg	Not done		Not done		Pos	Pos	0	0	2+	2+	UM Kwamouth	Mobile
2013-06-06	Female	58	Pos	Done	Neg	Done	Neg	13	Not done		Done	Neg	Pos	Pos	Done	Pos	Done	Pos	Pos	Pos	2+	2+	1+	1+	UM Kwamouth	Mobile
2013-06-06	Female	63	Pos	Done	Neg	Done	Neg	3	Not done		Done	Neg	Pos	Pos	Done	Pos	Done	Pos	Pos	Pos	1+	1+	1+	1+	UM Kwamouth	Mobile
2013-06-06	Female	50	Pos	Done	Neg	Done	Neg	12	Not done		Done	Neg	Pos	Pos	Done	Pos	Done	Pos	Neg	Neg	0	0	0	0	UM Kwamouth	Mobile
2013-06-06	Male	62	Neg	Done	Neg	Not done			Not done		Done	Neg	Pos	Pos	Done	Neg	Done	Neg	Pos	Pos	0	0	2+	2+	UM Kwamouth	Mobile
2013-06-06	Male	69	Neg	Done	Neg	Not done			Not done		Done	Neg	Pos	Pos	Done	Neg	Done	Neg	Neg	Neg	0	0	0	0	UM Kwamouth	Mobile
2013-06-06	Male	55	Pos	Done	Neg	Not done			Not done		Done	Neg	Pos	Pos	Done	Neg	Done	Neg	Pos	Pos	0	0	2+	2+	UM Kwamouth	Mobile
2013-06-07	Female	27	Pos	Not done		Done	Neg	2	Done	Pos	Not done		Pos	Pos	Done	Pos	Done	Pos	Pos	Pos	3+	3+	3+	3+	UM Kwamouth	Mobile
2013-06-07	Female	29	Neg	Done	Pos	Not done			Not done		Not done		Pos	Pos	Done	Pos	Done	Pos	Pos	Pos	2+	2+	2+	2+	UM Kwamouth	Mobile
2013-06-07	Male	23	Neg	Done	Neg	Done	Neg	4	Not done		Done	Neg	Pos	Pos	Done	Pos	Done	Pos	Neg	Neg	0	0	0	0	UM Kwamouth	Mobile
2013-06-07	Female	32	Pos	Done	Pos	Done	Neg	3	Not done		Not done		Pos	Pos	Done	Neg	Done	Neg	Pos	Pos	0	0	1+	1+	UM Kwamouth	Mobile
2013-06-08	Female	65	Neg	Done	Neg	Not done			Not done		Done	Neg	Neg	Neg	Not done		Not done		Pos	Pos	0	0	2+	2+	UM Kwamouth	Mobile
2013-06-08	Male	43	Pos	Not done		Done	Neg	7	Done	Pos	Not done		Neg	Neg	Not done		Not done		Pos	Pos	2+	2+	0	0	UM Kwamouth	Mobile
2013-06-09	Male	74	Neg	Done	Pos	Done	Neg	30	Not done		Not done		Neg	Neg	Not done		Not done		Pos	Pos	2+	2+	2+	2+	UM Kwamouth	Mobile
2013-06-09	Male	15	Pos	Done	Pos	Done	Pos	685	Not done		Not done		Neg	Neg	Not done		Not done		Pos	Pos	2+	2+	2+	2+	UM Kwamouth	Mobile
2013-06-09	Male	49	Pos	Done	Neg	Not done			Not done		Done	Neg	Neg	Neg	Not done		Not done		Pos	Pos	0	0	2+	2+	UM Kwamouth	Mobile
2013-06-10	Male	70	Neg	Done	Neg	Not done			Not done		Done	Neg	Neg	Neg	Not done		Not done		Pos	Pos	0	0	1+	1+	UM Kwamouth	Mobile
2013-06-10	Male	5	Neg	Not done		Done	Neg	3	Done	Pos	Not done		Pos	Pos	Done	Pos	Done	Pos	Pos	Pos	0	0	2+	2+	UM Kwamouth	Mobile
2013-06-10	Male	49	Neg	Done	Neg	Not done			Not done		Not done		Neg	Neg	Not done		Not done		Pos	Pos	1+	1+	1+	1+	UM Kwamouth	Mobile
2013-06-10	Male	17	Pos	Done	Neg	Not done			Not done		Not done		Neg	Neg	Not done		Not done		Pos	Pos	1+	1+	0	0	UM Kwamouth	Mobile
2013-06-10	Male	13	Pos	Done	Neg	Not done			Not done		Done	Neg	Neg	Neg	Not done		Not done		Pos	Pos	1+	1+	1+	1+	UM Kwamouth	Mobile
2013-06-11	Female	53	Pos	Done	Neg	Not done			Not done		Done	Neg	Neg	Neg	Not done		Not done		Pos	Pos	2+	2+	0	0	UM Kwamouth	Mobile
2013-06-11	Male	43	Neg	Done	Neg	Not done			Not done		Done	Neg	Pos	Pos	Done	Pos	Done	Pos	Neg	Neg	0	0	0	0	UM Kwamouth	Mobile
2013-06-12	Female	19	Pos	Done	Neg	Not done			Not done		Done	Neg	Neg	Neg	Not done		Not done		Pos	Pos	2+	2+	0	0	UM Kwamouth	Mobile
2013-06-12	Female	67	Pos	Done	Neg	Done	Neg	2	Not done		Done	Pos	Neg	Neg	Not done		Not done		Pos	Pos	2+	2+	2+	2+	UM Kwamouth	Mobile
2013-06-12	Male	11	Pos	Done	Pos	Done	Neg	2	Not done		Done	Pos	Neg	Neg	Not done		Not done		Pos	Pos	2+	2+	2+	2+	UM Kwamouth	Mobile
2013-06-12	Female	27	Neg	Done	Neg	Not done			Not done		Done	Neg	Neg	Neg	Not done		Not done		Pos	Pos	1+	1+	0	0	UM Kwamouth	Mobile
2013-06-12	Male	47	Pos	Done	Neg	Done	Neg	3	Done	Neg	Done	Pos	Pos	Pos	Done	Pos	Done	Pos	Pos	Pos	2+	2+	2+	2+	UM Kwamouth	Mobile
2013-06-13	Female	17	Pos	Done	Neg	Done	Neg	2	Not done		Done	Neg	Pos	Pos	Done	Pos	Done	Pos	Pos	Pos	2+	2+	2+	2+	UM Kwamouth	Mobile
2013-06-13	Male	13	Pos	Done	Neg	Not done			Not done		Done	Neg	Pos	Pos	Done	Neg	Done	Neg	Pos	Pos	2+	2+	0	0	UM Kwamouth	Mobile
2013-06-13	Male	23	Pos	Done	Neg	Not done			Not done		Done	Neg	Neg	Neg	Not done		Not done		Pos	Pos	2+	2+	0	0	UM Kwamouth	Mobile
2013-03-14	Male	7	Pos	Done	Neg	Not done			Not done		Done	Neg	Neg	Neg	Not done		Not done		Pos	Pos	0	0	1+	1+	UM Kwamouth	Mobile
2013-06-14	Female	26	Neg	Done	Neg	Not done			Not done		Done	Neg	Pos	Pos	Done	Neg	Done	Neg	Neg	Neg	0	0	0	0	UM Kwamouth	Mobile
2013-06-14	Male	60	Pos	Done	Neg	Not done			Not done		Done	Neg	Neg	Neg	Not done		Not done		Pos	Pos	0	0	2+	1+	UM Kwamouth	Mobile
2013-06-14	Female	27	Pos	Not done		Done	Pos	300	Done	Pos	Not done		Pos	Pos	Done	Pos	Done	Pos	Pos	Pos	2+	2+	2+	2+	UM Kwamouth	Mobile
2013-06-14	Male	16	Pos	Done	Neg	Not done			Not done		Done	Neg	Neg	Neg	Not done		Not done		Pos	Pos	0	0	2+	2+	UM Kwamouth	Mobile
2013-06-14	Female	34	Pos	Done	Neg	Not done			Not done		Done	Neg	Neg	Neg	Not done		Not done		Pos	Pos	2+	2+	0	0	UM Kwamouth	Mobile
2013-06-15	Female	17	Pos	Not done		Done	Neg	7	Done	Pos	Not done		Pos	Pos	Done	Pos	Done	Pos	Pos	Pos	2+	2+	2+	2+	UM Kwamouth	Mobile
2013-06-19	Female	35	Pos	Done	Neg	Not done			Done	Neg	Done	Neg	Neg	Neg	Not done		Not done		Pos	Pos	0	0	1+	1+	UM Kwamouth	Mobile
2013-06-22	Female	38	Pos	Done	Neg	Not done			Done	Neg	Done	Neg	Neg	Neg	Not done		Not done		Pos	Pos	2+	2+	2+	2+	UM Kwamouth	Mobile
2013-06-22	Female	10	Neg	Done	Neg	Not done			Not done		Done	Neg	Neg	Neg	Not done		Not done		Pos	Pos	0	0	1+	1+	UM Kwamouth	Mobile
2013-06-19	Female	6	Neg	Done	Neg	Not done			Done	Neg	Done	Neg	Neg	Neg	Not done		Not done		Pos	Pos	0	0	2+	2+	UM Kwamouth	Mobile
2013-06-19	Female	14	Neg	Done	Neg	Not done			Not done		Done	Neg	Pos	Pos	Done	Neg	Done	Neg	Neg	Neg	0	0	0	0	UM Kwamouth	Mobile
2013-06-20	Male	64	Neg	Done	Neg	Not done			Not done		Done	Neg	Pos	Pos	Done	Neg	Done	Neg	Neg	Neg	0	0	0	0	UM Kwamouth	Mobile
2013-06-20	Female	28	Neg	Done	Neg	Not done			Done	Neg	Done	Neg	Pos	Pos	Done	Neg	Done	Neg	Neg	Neg	0	0	0	0	UM Kwamouth	Mobile
2013-06-20	Female	9	Neg	Done	Neg	Not done			Not done		Done	Neg	Neg	Neg	Not done		Not done		Pos	Pos	2+	2+	0	0	UM Kwamouth	Mobile
2013-06-21	Male	55	Neg	Done	Neg	Not done			Done	Neg	Done	Neg	Neg	Neg	Not done		Not done		Pos	Pos	0	0	1+	1+	UM Kwamouth	Mobile
2013-06-19	Female	39	Pos	Done	Neg	Done	Neg	2	Not done		Done	Neg	Pos	Pos	Done	Pos	Done	Pos	Pos	Pos	2+	2+	2+	2+	UM Kwamouth	Mobile
2013-06-21	Female	22	Neg	Done	Neg	Not done			Not done		Done	Neg	Neg	Neg	Not done		Not done		Pos	Pos	0	0	1+	1+	UM Kwamouth	Mobile
2013-06-21	Male	6	Neg	Done	Pos	Done	Neg	4	Not done		Not done		Neg	Neg	Not done		Not done		Pos	Pos	1+	1+	2+	2+	UM Kwamouth	Mobile
2013-06-22	Male	10	Pos	Done	Neg	Not done			Done	Neg	Done	Neg	Neg	Neg	Not done		Not done		Pos	Pos	2+	2+	2+	2+	UM Kwamouth	Mobile
2013-06-22	Female	52	Neg	Not done		Done	Neg	1	Done	Pos	Not done		Pos	Pos	Done	Pos	Done	Pos	Pos	Pos	2+	2+	2+	2+	UM Kwamouth	Mobile
2013-06-22	Male	16	Pos	Done	Neg	Not done			Done	Neg	Done	Neg	Pos	Pos	Done	Pos	Done	Pos	Pos	Pos	2+	1+	2+	2+	UM Kwamouth	Mobile
2013-06-22	Male	11	Neg	Done	Neg	Not done			Not done		Done	Neg	Pos	Pos	Done	Neg	Done	Neg	Neg	Neg	0	0	0	0	UM Kwamouth	Mobile
2013-06-23	Male	14	Pos	Done	Neg	Not done			Not done		Done	Neg	Neg	Neg	Not done		Not done		Pos	Pos	0	0	2+	2+	UM Kwamouth	Mobile
2013-06-23	Male	14	Pos	Done	Neg	Not done			Not done		Done	Neg	Neg	Neg	Not done		Not done		Pos	Pos	2+	2+	2+	2+	UM Kwamouth	Mobile
2013-06-23	Female	14	Pos	Done	Neg	Not done			Not done		Done	Neg	Neg	Neg	Not done		Not done		Pos	Pos	0	0	1+	1+	UM Kwamouth	Mobile
2013-06-24	Female	31	Pos	Done	Neg	Not done			Done	Neg	Done	Neg	Pos	Pos	Done	Pos	Done	Pos	Pos	Pos	2+	2+	2+	2+	UM Kwamouth	Mobile
2013-06-24	Female	37	Neg	Done	Neg	Not done			Not done		Done	Neg	Pos	Pos	Done	Neg	Done	Neg	Pos	Pos	0	0	2+	2+	UM Kwamouth	Mobile
2013-06-24	Male	39	Neg	Done	Neg	Not done			Not done		Done	Neg	Neg	Neg	Not done		Not done		Pos	Pos	2+	2+	2+	2+	UM Kwamouth	Mobile
2013-06-25	Female	4	Neg	Done	Neg	Not done			Not done		Done	Neg	Neg	Neg	Not done		Not done		Pos	Pos	2+	2+	0	0	UM Kwamouth	Mobile
2013-06-25	Female	22	Pos	Done	Neg	Not done			Not done		Done	Neg	Neg	Neg	Not done		Not done		Pos	Pos	1+	1+	1+	1+	UM Kwamouth	Mobile
2013-06-25	Female	20	Neg	Done	Neg	Not done			Done	Neg	Done	Neg	Neg	Neg	Not done		Not done		Pos	Pos	2+	2+	2+	2+	UM Kwamouth	Mobile
2013-06-25	Male	47	Pos	Not done		Done	Neg	3	Done	Pos	Not done		Neg	Neg	Not done		Not done		Pos	Pos	2+	2+	2+	2+	UM Kwamouth	Mobile
2013-06-25	Male	47	Pos	Done	Neg	Not done			Not done		Done	Neg	Pos	Pos	Done	Neg	Done	Neg	Neg	Neg	0	0	0	0	UM Kwamouth	Mobile
2013-06-27	Female	12	Pos	Done	Neg	Not done			Done	Neg	Done	Neg	Pos	Pos	Done	Neg	Done	Neg	Neg	Neg	0	0	0	0	UM Kwamouth	Mobile
2013-06-27	Female	13	Neg	Done	Neg	Not done			Not done		Done	Neg	Pos	Pos	Done	Neg	Done	Neg	Neg	Neg	0	0	0	0	UM Kwamouth	Mobile
2013-06-27	Female	36	Pos	Done	Neg	Done	Neg	5	Not done		Done	Pos	Pos	Pos	Done	Pos	Done	Pos	Pos	Pos	1+	1+	1+	1+	UM Kwamouth	Mobile
2013-06-27	Female	32	Neg	Done	Neg	Not done			Not done		Done	Neg	Pos	Pos	Done	Neg	Done	Neg	Neg	Neg	0	0	0	0	UM Kwamouth	Mobile
2013-06-27	Female	9	Pos	Not done		Done	Neg	1	Done	Pos	Not done		Neg	Neg	Not done		Not done		Pos	Pos	2+	2+	2+	2+	UM Kwamouth	Mobile
2013-06-27	Male	31	Neg	Done	Neg	Not done			Not done		Done	Neg	Pos	Neg	Done	Neg	Done	Neg	Neg	Neg	0	0	0	0	UM Kwamouth	Mobile
2013-06-27	Female	20	Neg	Done	Neg	Not done			Not done		Done	Neg	Pos	Pos	Done	Neg	Done	Neg	Neg	Neg	0	0	0	0	UM Kwamouth	Mobile
2013-06-27	Male	18	Pos	Done	Neg	Not done			Not done		Done	Neg	Pos	Pos	Done	Neg	Done	Neg	Pos	Pos	0	0	1+	1+	UM Kwamouth	Mobile
2013-06-27	Female	61	Pos	Done	Neg	Not done			Not done		Done	Neg	Pos	Pos	Done	Neg	Done	Neg	Neg	Neg	0	0	0	0	UM Kwamouth	Mobile
2013-06-28	Female	9	Neg	Not done		Not done			Not done		Done	Neg	Pos	Pos	Done	Neg	Done	Neg	Neg	Neg	0	0	0	0	UM Kwamouth	Mobile
2013-06-28	Female	22	Neg	Done	Neg	Not done			Done	Neg	Done	Neg	Pos	Pos	Done	Neg	Done	Neg	Neg	Neg	0	0	0	0	UM Kwamouth	Mobile
2013-06-28	Female	48	Pos	Done	Neg	Not done			Not done		Done	Neg	Pos	Pos	Done	Pos	Done	Pos	Pos	Pos	1+	1+	1+	1+	UM Kwamouth	Mobile
2013-03-22	Male	5	Neg	Done	Neg	Not done			Done	Neg	Done	Neg	Neg	Neg	Not done		Not done		Pos	Pos	2+	2+	0	0	UM Kwamouth	Mobile
2013-07-22	Female	21	Neg	Done	Pos	Done	Neg	4	Not done		Not done		Pos	Pos	Done	Pos	Done	Pos	Pos	Pos	0	0	1+	1+	UM Kwamouth	Mobile
2013-07-22	Female	6	Neg	Done	Neg	Not done			Not done		Done	Neg	Neg	Neg	Not done		Not done		Pos	Pos	2+	2+	0	0	UM Kwamouth	Mobile
2013-07-30	Male	50	Neg	Done	Neg	Not done			Not done		Done	Neg	Neg	Neg	Not done		Not done		Pos	Pos	1+	1+	0	0	UM Kwamouth	Mobile
2013-07-23	Female	20	Neg	Done	Neg	Not done			Done	Neg	Done	Neg	Neg	Neg	Not done		Not done		Pos	Pos	2+	2+	2+	2+	UM Kwamouth	Mobile
2013-07-23	Female	23	Neg	Done	Neg	Not done			Not done		Done	Neg	Neg	Neg	Not done		Not done		Pos	Pos	2+	2+	2+	2+	UM Kwamouth	Mobile
2013-07-24	Male	8	Neg	Done	Neg	Not done			Not done		Done	Neg	Pos	Pos	Done	Neg	Done	Neg	Pos	Pos	1+	1+	0	0	UM Kwamouth	Mobile
2013-07-24	Female	43	Neg	Done	Neg	Not done			Not done		Done	Neg	Neg	Neg	Not done		Not done		Pos	Pos	0	0	2+	2+	UM Kwamouth	Mobile
2013-07-24	Female	22	Neg	Done	Neg	Not done			Not done		Done	Neg	Neg	Neg	Not done		Not done		Pos	Pos	2+	2+	2+	2+	UM Kwamouth	Mobile
2013-07-25	Male	26	Pos	Done	Neg	Not done			Not done		Done	Neg	Neg	Neg	Not done		Not done		Pos	Pos	2+	2+	0	0	UM Kwamouth	Mobile
2013-07-25	Female	21	Pos	Done	Neg	Not done			Not done		Done	Neg	Neg	Neg	Not done		Not done		Pos	Pos	2+	2+	2+	2+	UM Kwamouth	Mobile
2013-07-25	Male	34	Neg	Done	Neg	Not done			Not done		Done	Neg	Neg	Neg	Not done		Not done		Pos	Pos	2+	2+	2+	2+	UM Kwamouth	Mobile
2013-07-25	Female	11	Neg	Done	Neg	Not done			Not done		Done	Neg	Neg	Neg	Not done		Not done		Pos	Pos	2+	2+	0	0	UM Kwamouth	Mobile
2013-07-25	Male	27	Neg	Done	Neg	Not done			Not done		Done	Neg	Pos	Pos	Done	Neg	Done	Neg	Pos	Pos	0	0	2+	2+	UM Kwamouth	Mobile
2013-07-25	Male	21	Neg	Done	Neg	Not done			Not done		Done	Neg	Neg	Neg	Not done		Not done		Pos	Pos	2+	2+	0	0	UM Kwamouth	Mobile
2013-07-26	Female	59	Pos	Done	Neg	Not done			Not done		Done	Neg	Neg	Neg	Not done		Not done		Pos	Pos	1+	1+	1+	1+	UM Kwamouth	Mobile
2013-07-27	Male	31	Neg	Done	Pos	Done	Pos	300	Not done		Not done		Pos	Pos	Done	Pos	Done	Pos	Pos	Pos	2+	2+	2+	2+	UM Kwamouth	Mobile
2013-07-28	Male	28	Pos	Done	Neg	Not done			Not done		Done	Neg	Neg	Neg	Not done		Not done		Pos	Pos	2+	2+	2+	2+	UM Kwamouth	Mobile
2013-07-28	Male	12	Pos	Done	Neg	Not done			Not done		Done	Neg	Pos	Pos	Done	Neg	Done	Neg	Pos	Pos	0	0	2+	2+	UM Kwamouth	Mobile
2013-07-28	Female	4	Neg	Done	Neg	Not done			Not done		Done	Neg	Neg	Neg	Not done		Not done		Pos	Pos	2+	2+	0	0	UM Kwamouth	Mobile
2013-07-28	Female	28	Neg	Done	Neg	Not done			Not done		Done	Neg	Neg	Neg	Not done		Not done		Pos	Pos	2+	2+	0	0	UM Kwamouth	Mobile
2013-07-28	Female	14	Pos	Done	Pos	Done	Neg	53	Not done		Not done		Neg	Neg	Not done		Not done		Pos	Pos	2+	2+	2+	2+	UM Kwamouth	Mobile
2013-07-28	Male	54	Pos	Done	Neg	Not done			Not done		Done	Neg	Neg	Neg	Not done		Not done		Pos	Pos	0	0	2+	2+	UM Kwamouth	Mobile
2013-07-28	Male	55	Pos	Done	Neg	Not done			Not done		Done	Neg	Pos	Pos	Done	Pos	Done	Pos	Neg	Neg	0	0	0	0	UM Kwamouth	Mobile
2013-07-28	Female	6	Pos	Done	Neg	Not done			Not done		Done	Neg	Pos	Pos	Done	Neg	Done	Neg	Pos	Pos	2+	2+	2+	2+	UM Kwamouth	Mobile
2013-07-28	Female	10	Neg	Done	Neg	Not done			Not done		Done	Neg	Neg	Neg	Not done		Not done		Pos	Pos	0	0	2+	2+	UM Kwamouth	Mobile
2013-07-28	Female	54	Pos	Done	Neg	Not done			Not done		Done	Neg	Neg	Neg	Not done		Not done		Pos	Pos	0	0	2+	2+	UM Kwamouth	Mobile
2013-07-29	Male	48	Pos	Done	Neg	Done	Neg	3	Not done		Done	Neg	Pos	Pos	Done	Pos	Done	Pos	Pos	Pos	0	0	2+	2+	UM Kwamouth	Mobile
2013-07-29	Female	52	Neg	Done	Neg	Not done			Not done		Done	Neg	Neg	Neg	Not done		Not done		Pos	Pos	2+	2+	0	0	UM Kwamouth	Mobile
2013-07-29	Male	60	Pos	Done	Neg	Not done			Not done		Done	Neg	Neg	Neg	Not done		Not done		Pos	Pos	2+	2+	2+	2+	UM Kwamouth	Mobile
2013-07-29	Female	38	Pos	Done	Neg	Not done			Not done		Done	Neg	Pos	Pos	Done	Neg	Done	Neg	Neg	Neg	0	0	0	0	UM Kwamouth	Mobile
2013-07-30	Female	4	Pos	Done	Neg	Not done			Not done		Done	Neg	Neg	Neg	Not done		Not done		Pos	Pos	2+	2+	0	0	UM Kwamouth	Mobile
2013-07-30	Female	0	Neg	Done	Neg	Not done			Not done		Done	Neg	Neg	Neg	Not done		Not done		Pos	Pos	2+	2+	0	0	UM Kwamouth	Mobile
2013-08-01	Male	3	Pos	Done	Neg	Not done			Not done		Done	Neg	Neg	Neg	Not done		Not done		Pos	Pos	0	0	2+	2+	UM Kwamouth	Mobile
2013-08-01	Female	20	Neg	Done	Neg	Not done			Not done		Done	Neg	Pos	Pos	Done	Neg	Done	Neg	Pos	Pos	1+	1+	1+	1+	UM Kwamouth	Mobile
2013-08-01	Female	47	Pos	Done	Neg	Not done			Not done		Done	Neg	Pos	Pos	Done	Neg	Done	Neg	Pos	Pos	2+	2+	0	0	UM Kwamouth	Mobile
2013-08-01	Male	14	Pos	Done	Neg	Not done			Not done		Done	Neg	Neg	Neg	Not done		Not done		Pos	Pos	2+	2+	0	0	UM Kwamouth	Mobile
2013-08-01	Male	11	Pos	Done	Neg	Not done			Not done		Done	Neg	Pos	Pos	Done	Neg	Done	Neg	Neg	Neg	0	0	0	0	UM Kwamouth	Mobile
2013-08-02	Male	58	Pos	Done	Neg	Not done			Not done		Done	Neg	Neg	Neg	Not done		Not done		Pos	Pos	0	0	1+	1+	UM Kwamouth	Mobile
2013-08-02	Female	22	Pos	Done	Neg	Not done			Not done		Done	Neg	Neg	Neg	Not done		Not done		Pos	Pos	0	0	1+	1+	UM Kwamouth	Mobile
2013-08-02	Female	63	Pos	Done	Neg	Not done			Not done		Done	Neg	Neg	Neg	Not done		Not done		Pos	Pos	2+	2+	0	0	UM Kwamouth	Mobile
2013-08-02	Female	33	Pos	Done	Neg	Not done			Not done		Done	Neg	Neg	Neg	Not done		Not done		Pos	Pos	0	0	2+	2+	UM Kwamouth	Mobile
2013-08-02	Female	12	Pos	Done	Neg	Not done			Done	Neg	Done	Neg	Pos	Pos	Done	Neg	Done	Neg	Pos	Pos	2+	2+	0	0	UM Kwamouth	Mobile
2013-08-03	Female	24	Pos	Done	Neg	Not done			Not done		Done	Neg	Pos	Pos	Done	Neg	Done	Neg	Pos	Pos	2+	2+	0	0	UM Kwamouth	Mobile
2013-08-03	Male	20	Neg	Done	Neg	Not done			Not done		Done	Neg	Neg	Neg	Not done		Not done		Pos	Pos	2+	2+	0	0	UM Kwamouth	Mobile
2013-08-03	Male	26	Pos	Done	Neg	Not done			Not done		Done	Neg	Neg	Neg	Not done		Not done		Pos	Pos	2+	2+	2+	2+	UM Kwamouth	Mobile
2013-08-03	Female	16	Pos	Done	Neg	Not done			Done	Neg	Done	Neg	Pos	Pos	Done	Neg	Done	Neg	Pos	Pos	2+	2+	2+	2+	UM Kwamouth	Mobile
2013-08-03	Female	24	Pos	Done	Neg	Not done			Not done		Done	Neg	Pos	Pos	Done	Neg	Done	Neg	Neg	Neg	0	0	0	0	UM Kwamouth	Mobile
2013-08-03	Male	15	Neg	Done	Neg	Not done			Not done		Done	Neg	Pos	Pos	Done	Neg	Done	Neg	Neg	Neg	0	0	0	0	UM Kwamouth	Mobile
2013-08-03	Male	11	Pos	Done	Neg	Not done			Not done		Done	Neg	Pos	Pos	Done	Neg	Done	Neg	Pos	Pos	2+	2+	0	0	UM Kwamouth	Mobile
2013-08-04	Female	42	Pos	Done	Neg	Not done			Not done		Done	Neg	Neg	Neg	Not done		Not done		Pos	Pos	2+	2+	2+	2+	UM Kwamouth	Mobile
2013-08-04	Female	25	Pos	Done	Neg	Not done			Not done		Done	Neg	Pos	Pos	Done	Neg	Done	Neg	Neg	Neg	0	0	0	0	UM Kwamouth	Mobile
2013-08-04	Male	64	Neg	Done	Neg	Not done			Not done		Done	Neg	Pos	Pos	Done	Neg	Done	Neg	Neg	Neg	0	0	0	0	UM Kwamouth	Mobile
2013-08-04	Female	57	Pos	Done	Neg	Not done			Not done		Done	Neg	Pos	Pos	Done	Neg	Done	Neg	Pos	Pos	2+	2+	2+	2+	UM Kwamouth	Mobile
2013-08-04	Female	30	Pos	Done	Neg	Done	Neg	2	Not done		Done	Pos	Pos	Pos	Done	Pos	Done	Pos	Pos	Pos	1+	1+	1+	1+	UM Kwamouth	Mobile
2013-08-04	Male	50	Neg	Done	Neg	Not done			Not done		Done	Neg	Neg	Neg	Not done		Not done		Pos	Pos	2+	2+	2+	2+	UM Kwamouth	Mobile
2013-08-04	Female	29	Pos	Done	Neg	Not done			Not done		Done	Neg	Neg	Neg	Not done		Not done		Pos	Pos	2+	3+	2+	3+	UM Kwamouth	Mobile
2013-08-04	Female	45	Pos	Done	Neg	Not done			Not done		Done	Neg	Neg	Neg	Not done		Not done		Pos	Pos	0	0	2+	2+	UM Kwamouth	Mobile
2013-08-04	Female	51	Pos	Done	Neg	Not done			Not done		Done	Neg	Pos	Pos	Done	Pos	Done	Pos	Pos	Pos	2+	2+	2+	2+	UM Kwamouth	Mobile
2013-08-29	Male	27	Pos	Done	Neg	Not done			Not done		Not done		Neg	Neg	Not done		Not done		Pos	Pos	0	0	2+	2+	UM Kwamouth	Mobile
2013-08-29	Female	13	Pos	Done	Neg	Not done			Done	Neg	Not done		Pos	Pos	Done	Neg	Done	Neg	Pos	Pos	2+	2+	0	0	UM Kwamouth	Mobile
2013-08-29	Female	10	Neg	Done	Neg	Not done			Not done		Not done		Neg	Neg	Not done		Not done		Pos	Pos	0	0	2+	2+	UM Kwamouth	Mobile
2013-08-29	Female	16	Pos	Not done		Done	Neg	4	Done	Pos	Not done		Pos	Pos	Done	Pos	Done	Pos	Pos	Pos	2+	2+	2+	2+	UM Kwamouth	Mobile
2013-08-29	Male	20	Neg	Done	Neg	Not done			Not done		Not done		Neg	Neg	Not done		Not done		Pos	Pos	0	0	2+	2+	UM Kwamouth	Mobile
2013-08-29	Female	16	Pos	Done	Neg	Not done			Not done		Not done		Neg	Neg	Not done		Not done		Pos	Pos	0	0	2+	2+	UM Kwamouth	Mobile
2013-08-29	Male	9	Pos	Done	Pos	Done	Neg	3	Not done		Not done		Pos	Pos	Done	Pos	Done	Pos	Neg	Neg	0	0	0	0	UM Kwamouth	Mobile
2013-08-29	Female	15	Pos	Done	Pos	Done	Neg	4	Not done		Not done		Pos	Pos	Done	Pos	Done	Pos	Pos	Pos	0	0	2+	2+	UM Kwamouth	Mobile
2013-08-29	Male	14	Pos	Done	Pos	Done	Neg	3	Not done		Not done		Pos	Pos	Done	Pos	Done	Pos	Pos	Pos	2+	2+	2+	2+	UM Kwamouth	Mobile
2013-04-29	Male	10	Not done	Not done		Done	Neg	150	Done	Pos	Not done		Pos	Pos	Done	Pos	Done	Pos	Pos	Pos	1+	1+	2+	2+	HGR Kwamouth	Fixed
2013-04-30	Female	12	Not done	Done	Pos	Done	Neg	34	Not done		Not done		Pos	Pos	Done	Pos	Done	Pos	Pos	Pos	1+	1+	1+	1+	HGR Kwamouth	Fixed
2013-05-07	Female	16	Pos	Done	Neg	Not done			Not done		Done	Neg	Pos	Pos	Done	Neg	Done	Neg	Neg	Neg	0	0	0	0	HGR Kwamouth	Fixed
2013-05-10	Male	65	Neg	Done	Pos	Done	Pos	400	Not done		Done	Pos	Pos	Pos	Done	Pos	Done	Pos	Pos	Pos	1+	1+	1+	1+	HGR Kwamouth	Fixed
2013-05-11	Female	20	Neg	Done	Pos	Done	Neg	9	Not done		Done	Neg	Pos	Pos	Done	Pos	Done	Pos	Pos	Pos	2+	2+	2+	2+	HGR Kwamouth	Fixed
2013-05-11	Female	53	Neg	Not done		Done	Neg	3	Done	Pos	Not done		Pos	Pos	Done	Pos	Done	Pos	Pos	Pos	1+	1+	1+	1+	HGR Kwamouth	Fixed
2013-05-13	Female	16	Neg	Done	Neg	Not done			Not done		Done	Neg	Neg	Neg	Done	Neg	Done	Neg	Pos	Pos	0	0	1+	1+	HGR Kwamouth	Fixed
2013-05-13	Female	20	Pos	Done	Neg	Not done			Not done		Done	Neg	Pos	Pos	Done	Neg	Done	Neg	Neg	Neg	0	0	0	0	HGR Kwamouth	Fixed
2013-05-14	Female	29	Neg	Done	Neg	Not done			Not done		Done	Neg	Neg	Neg	Done	Neg	Done	Neg	Pos	Pos	0	0	2+	2+	HGR Kwamouth	Fixed
2013-05-23	Female	23	Neg	Done	Neg	Not done			Not done		Done	Neg	Neg	Neg	Not done		Not done		Pos	Pos	1+	1+	1+	1+	HGR Kwamouth	Fixed
2013-05-27	Female	50	Pos	Done	Neg	Not done			Not done		Done	Neg	Neg	Neg	Not done		Not done		Pos	Pos	1+	0	1+	1+	HGR Kwamouth	Fixed
2013-05-28	Male	48	Pos	Not done		Done	Pos	470	Done	Pos	Not done		Pos	Pos	Not done		Not done		Pos	Pos	3+	2+	3+	3+	HGR Kwamouth	Fixed
2013-06-04	Male	45	Neg	Done	Pos	Done	Pos	461	Not done		Not done		Pos	Pos	Done	Pos	Done	Pos	Pos	Pos	2+	2+	2+	2+	HGR Kwamouth	Fixed
2013-06-04	Female	23	Neg	Done	Neg	Not done			Not done		Done	Neg	Pos	Pos	Done	Neg	Done	Neg	Pos	Pos	1+	1+	1+	1+	HGR Kwamouth	Fixed
2013-06-06	Male	18	Pos	Done	Neg	Not done			Not done		Done	Neg	Pos	Pos	Done	Neg	Done	Neg	Neg	Neg	0	0	0	0	HGR Kwamouth	Fixed
2013-06-10	Female	23	Neg	Done	Neg	Not done			Not done		Done	Neg	Neg	Neg	Not done		Not done		Pos	Pos	1+	1+	1+	1+	HGR Kwamouth	Fixed
2013-06-14	Male	43	Neg	Done	Neg	Not done			Not done		Done	Neg	Neg	Neg	Not done		Not done		Pos	Pos	1+	1+	1+	1+	HGR Kwamouth	Fixed
2013-06-17	Female	0	Pos	Done	Pos	Done	Neg	1	Not done		Not done		Pos	Pos	Done	Pos	Done	Pos	Pos	Pos	2+	2+	2+	2+	HGR Kwamouth	Fixed
2013-06-17	Female	30	Pos	Done	Pos	Done	Neg	2	Not done		Not done		Pos	Pos	Done	Pos	Done	Pos	Pos	Pos	2+	2+	2+	2+	HGR Kwamouth	Fixed
2013-06-20	Female	18	Pos	Done	Neg	Done	Pos	250	Not done		Not done		Pos	Pos	Done	Pos	Done	Pos	Pos	Pos	2+	2+	2+	2+	HGR Kwamouth	Fixed
2013-06-22	Male	44	Neg	Done	Pos	Done	Pos	350	Not done		Not done		Pos	Pos	Done	Pos	Done	Pos	Pos	Pos	2+	2+	2+	2+	HGR Kwamouth	Fixed
2013-07-08	Female	31	Neg	Done	Neg	Not done			Not done		Done	Pos	Pos	Pos	Done	Pos	Done	Pos	Pos	Pos	2+	2+	2+	2+	HGR Kwamouth	Fixed
2013-07-13	Male	40	Neg	Done	Neg	Not done			Not done		Done	Neg	Pos	Pos	Done	Neg	Done	Neg	Pos	Pos	0	0	2+	2+	HGR Kwamouth	Fixed
2013-07-23	Male	5	Neg	Done	Pos	Done	Pos	450	Not done		Not done		Pos	Pos	Done	Pos	Done	Pos	Pos	Pos	1+	1+	0	0	HGR Kwamouth	Fixed
2013-07-29	Female	23	Not done	Done	Neg	Not done			Not done		Not done		Pos	Pos	Done	Neg	Done	Neg	Neg	Neg	0	0	0	0	HGR Kwamouth	Fixed
2013-07-30	Female	58	Not done	Done	Neg	Not done			Not done		Not done		Neg	Neg	Not done		Not done		Pos	Pos	1+	1+	1+	1+	HGR Kwamouth	Fixed
2013-08-03	Female	28	Not done	Done	Neg	Not done			Not done		Not done		Pos	Pos	Done	Neg	Done	Neg	Neg	Neg	0	0	0	0	HGR Kwamouth	Fixed
2013-08-17	Male	34	Pos	Done	Pos	Done	Pos	146	Not done		Not done		Neg	Neg	Not done		Not done		Pos	Pos	1+	1+	2+	2+	HGR Kwamouth	Fixed
2013-08-22	Female	14	Neg	Done	Neg	Done	Neg	4	Not done		Done	Pos	Pos	Pos	Done	Pos	Done	Pos	Pos	Pos	1+	1+	0	0	HGR Kwamouth	Fixed
2013-05-21	Male	59	Neg	Done	Neg	Not done			Not done		Done	Neg	Pos	Neg	Done	Neg	Done	Neg	Pos	Pos	3+	2+	3+	1+	UM Kakenge	Mobile
2013-05-21	Female	8	Neg	Done	Neg	Not done			Not done		Done	Neg	Pos	Pos	Done	Neg	Done	Neg	Neg	Neg	0	0	0	0	UM Kakenge	Mobile
2013-05-21	Female	50	Neg	Done	Neg	Not done			Not done		Done	Neg	Pos	Neg	Done	Neg	Done	Neg	Neg	Neg	0	0	0	0	UM Kakenge	Mobile
2013-07-12	Female	7	Pos	Done	Neg	Not done			Not done		Done	Neg	Neg	Neg	Not done		Not done		Pos	Pos	0	2+	2+	0	UM Kakenge	Mobile
2013-06-11	Male	64	Neg	Done	Neg	Done	Neg	1	Not done		Done	Neg	Pos	Pos	Done	Pos	Done	Pos	Neg	Neg	0	0	0	0	UM Kakenge	Mobile
2013-06-11	Female	25	Pos	Done	Neg	Not done			Not done		Done	Neg	Pos	Neg	Done	Neg	Done	Neg	Pos	Neg	0	0	1+	0	UM Kakenge	Mobile
2013-06-11	Female	36	Neg	Done	Neg	Not done			Not done		Done	Neg	Neg	Neg	Done	Neg	Done	Neg	Pos	Pos	1+	1+	1+	1+	UM Kakenge	Mobile
2013-06-12	Female	8	Pos	Done	Neg	Done	Neg	1	Not done		Done	Neg	Neg	Neg	Done	Neg	Done	Neg	Pos	Pos	2+	1+	2+	1+	UM Kakenge	Mobile
2013-06-12	Female	45	Pos	Done	Neg	Not done			Not done		Done	Neg	Pos	Pos	Done	Neg	Done	Neg	Neg	Neg	0	0	0	0	UM Kakenge	Mobile
2013-06-12	Female	53	Pos	Done	Neg	Not done			Not done		Done	Neg	Pos	Pos	Done	Neg	Done	Neg	Neg	Neg	0	0	0	0	UM Kakenge	Mobile
2013-06-12	Female	8	Pos	Done	Neg	Done	Neg	2	Done	Neg	Done	Neg	Pos	Pos	Done	Pos	Done	Pos	Neg	Neg	0	0	0	0	UM Kakenge	Mobile
2013-06-14	Female	16	Neg	Done	Neg	Not done			Not done		Done	Neg	Pos	Pos	Done	Neg	Done	Neg	Neg	Neg	0	0	0	0	UM Kakenge	Mobile
2013-06-14	Male	13	Pos	Done	Neg	Not done			Not done		Done	Neg	Pos	Pos	Done	Neg	Done	Neg	Neg	Neg	0	0	0	0	UM Kakenge	Mobile
2013-06-14	Male	13	Pos	Done	Neg	Done	Neg	1	Not done		Done	Neg	Pos	Pos	Done	Pos	Done	Pos	Neg	Neg	0	0	0	0	UM Kakenge	Mobile
2013-06-14	Female	13	Pos	Done	Neg	Done	Neg	1	Done	Neg	Done	Neg	Pos	Pos	Done	Pos	Done	Pos	Neg	Neg	0	0	0	0	UM Kakenge	Mobile
2013-06-15	Male	6	Pos	Done	Neg	Not done			Not done		Done	Neg	Neg	Neg	Done	Neg	Done	Neg	Pos	Pos	0	0	2+	2+	UM Kakenge	Mobile
2013-06-15	Male	6	Pos	Done	Neg	Done	Neg	1	Not done		Done	Neg	Pos	Pos	Done	Pos	Done	Pos	Neg	Neg	0	0	0	0	UM Kakenge	Mobile
2013-06-15	Female	65	Pos	Done	Neg	Done	Neg	1	Not done		Done	Neg	Pos	Pos	Done	Neg	Done	Neg	Pos	Pos	2+	2+	0	1+	UM Kakenge	Mobile
2013-06-15	Male	70	Pos	Done	Neg	Not done			Not done		Not done		Pos	Pos	Done	Neg	Done	Neg	Pos	Pos	2+	1+	2+	1+	UM Kakenge	Mobile
2013-06-16	Female	6	Pos	Done	Neg	Not done			Not done		Done	Neg	Neg	Neg	Done	Neg	Done	Neg	Pos	Pos	0	0	3+	3+	UM Kakenge	Mobile
2013-06-16	Male	8	Pos	Done	Neg	Not done			Not done		Done	Neg	Neg	Neg	Done	Neg	Done	Neg	Pos	Pos	0	0	3+	2+	UM Kakenge	Mobile
2013-06-17	Male	43	Neg	Done	Neg	Not done			Not done		Done	Neg	Neg	Neg	Done	Neg	Done	Neg	Pos	Pos	2+	0	0	2+	UM Kakenge	Mobile
2013-06-17	Female	14	Pos	Done	Neg	Done	Neg	1	Done	Neg	Done	Neg	Pos	Pos	Done	Pos	Done	Pos	Neg	Neg	0	0	0	0	UM Kakenge	Mobile
2013-06-18	Male	12	Neg	Done	Neg	Not done			Done	Neg	Done	Neg	Neg	Neg	Done	Neg	Done	Neg	Pos	Neg	1+	0	0	0	UM Kakenge	Mobile
2013-06-18	Female	27	Neg	Done	Neg	Not done			Not done		Done	Neg	Neg	Neg	Done	Neg	Done	Neg	Pos	Neg	1+	0	0	0	UM Kakenge	Mobile
2013-06-18	Female	11	Pos	Done	Neg	Not done			Not done		Done	Neg	Neg	Neg	Done	Neg	Done	Neg	Pos	Pos	2+	2+	2+	2+	UM Kakenge	Mobile
2013-06-18	Female	9	Pos	Done	Neg	Not done			Not done		Done	Neg	Neg	Neg	Done	Neg	Done	Neg	Pos	Pos	3+	2+	2+	3+	UM Kakenge	Mobile
2013-06-19	Female	22	Neg	Done	Neg	Not done			Not done		Done	Neg	Neg	Neg	Done	Neg	Done	Neg	Pos	Pos	0	0	2+	2+	UM Kakenge	Mobile
2013-06-20	Female	24	Pos	Done	Neg	Not done			Done	Neg	Done	Neg	Pos	Pos	Done	Neg	Done	Neg	Neg	Neg	0	0	0	0	UM Kakenge	Mobile
2013-06-20	Male	55	Neg	Done	Neg	Not done			Not done		Done	Neg	Neg	Neg	Done	Neg	Done	Neg	Pos	Pos	0	0	2+	3+	UM Kakenge	Mobile
2013-06-20	Male	25	Neg	Done	Neg	Not done			Not done		Done	Neg	Neg	Neg	Done	Neg	Done	Neg	Pos	Pos	0	0	1+	2+	UM Kakenge	Mobile
2013-06-20	Male	42	Neg	Done	Neg	Not done			Not done		Done	Neg	Pos	Pos	Done	Neg	Done	Neg	Pos	Pos	0	0	1+	2+	UM Kakenge	Mobile
2013-06-21	Female	28	Pos	Done	Neg	Not done			Not done		Done	Neg	Neg	Neg	Done	Neg	Done	Neg	Pos	Pos	1+	1+	1+	1+	UM Kakenge	Mobile
2013-06-21	Male	18	Neg	Done	Neg	Not done			Not done		Done	Neg	Neg	Neg	Done	Neg	Done	Neg	Pos	Neg	0	0	1+	0	UM Kakenge	Mobile
2013-06-21	Female	35	Neg	Done	Neg	Not done			Not done		Done	Neg	Neg	Neg	Done	Neg	Done	Neg	Pos	Pos	0	0	2+	3+	UM Kakenge	Mobile
2013-06-22	Female	8	Pos	Done	Neg	Not done			Done	Neg	Done	Neg	Neg	Neg	Done	Neg	Done	Neg	Pos	Pos	2+	2+	1+	1+	UM Kakenge	Mobile
2013-06-22	Female	53	Neg	Done	Neg	Done	Neg	1	Not done		Done	Neg	Pos	Pos	Done	Pos	Done	Pos	Pos	Pos	0	0	2+	2+	UM Kakenge	Mobile
2013-06-23	Female	27	Neg	Not done		Done	Neg	1	Done	Pos	Not done		Pos	Pos	Done	Pos	Done	Pos	Pos	Pos	3+	4+	3+	3+	UM Kakenge	Mobile
2013-06-23	Male	13	Pos	Done	Neg	Not done			Done	Neg	Done	Neg	Pos	Pos	Done	Pos	Done	Pos	Pos	Pos	0	1+	1+	1+	UM Kakenge	Mobile
2013-06-23	Male	40	Pos	Done	Neg	Not done			Not done		Done	Neg	Pos	Pos	Done	Neg	Done	Neg	Neg	Neg	0	0	0	0	UM Kakenge	Mobile
2013-06-23	Female	37	Neg	Done	Neg	Not done			Not done		Done	Neg	Pos	Pos	Done	Neg	Done	Neg	Pos	Pos	0	0	1+	2+	UM Kakenge	Mobile
2013-06-23	Male	4	Pos	Done	Neg	Not done			Not done		Done	Neg	Pos	Pos	Done	Neg	Done	Neg	Neg	Neg	0	0	0	0	UM Kakenge	Mobile
2013-06-24	Female	10	Pos	Done	Neg	Not done			Not done		Done	Neg	Neg	Neg	Done	Neg	Done	Neg	Pos	Pos	1+	0	2+	3+	UM Kakenge	Mobile
2013-06-28	Female	18	Pos	Done	Neg	Not done			Not done		Done	Neg	Neg	Neg	Done	Neg	Done	Neg	Pos	Pos	2+	2+	1+	3+	UM Kakenge	Mobile
2013-06-28	Male	10	Neg	Done	Neg	Not done			Not done		Done	Neg	Neg	Neg	Done	Neg	Done	Neg	Pos	Pos	0	1+	0	0	UM Kakenge	Mobile
2013-06-28	Male	56	Pos	Done	Neg	Not done			Not done		Done	Neg	Pos	Pos	Done	Neg	Done	Neg	Pos	Pos	2+	2+	0	0	UM Kakenge	Mobile
2013-06-28	Female	40	Neg	Done	Neg	Not done			Not done		Done	Neg	Neg	Neg	Done	Neg	Done	Neg	Pos	Pos	0	0	3+	3+	UM Kakenge	Mobile
2013-06-28	Female	18	Pos	Done	Neg	Not done			Not done		Done	Neg	Pos	Pos	Done	Neg	Done	Neg	Neg	Neg	0	0	0	0	UM Kakenge	Mobile
2013-06-29	Female	32	Neg	Done	Neg	Not done			Not done		Done	Neg	Neg	Neg	Done	Neg	Done	Neg	Pos	Pos	1+	1+	3+	3+	UM Kakenge	Mobile
2013-06-29	Female	19	Pos	Done	Neg	Not done			Not done		Done	Neg	Pos	Pos	Done	Neg	Done	Neg	Neg	Neg	0	0	0	0	UM Kakenge	Mobile
2013-06-29	Female	30	Neg	Done	Neg	Not done			Not done		Done	Neg	Neg	Neg	Done	Neg	Done	Neg	Pos	Pos	2+	2+	1+	1+	UM Kakenge	Mobile
2013-06-29	Female	25	Neg	Done	Neg	Not done			Not done		Done	Neg	Neg	Neg	Done	Neg	Done	Neg	Pos	Pos	1+	1+	1+	1+	UM Kakenge	Mobile
2013-06-29	Female	19	Pos	Done	Neg	Not done			Not done		Done	Neg	Pos	Pos	Done	Neg	Done	Neg	Neg	Neg	0	0	0	0	UM Kakenge	Mobile
2013-06-29	Female	6	Neg	Done	Neg	Not done			Not done		Done	Neg	Pos	Pos	Done	Neg	Done	Neg	Pos	Pos	2+	3+	2+	2+	UM Kakenge	Mobile
2013-06-29	Female	15	Pos	Done	Neg	Not done			Not done		Done	Neg	Neg	Neg	Done	Neg	Done	Neg	Pos	Pos	0	0	1+	1+	UM Kakenge	Mobile
2013-07-12	Male	20	Pos	Done	Neg	Not done			Not done		Done	Neg	Pos	Pos	Done	Neg	Done	Neg	Neg	Neg	0	0	0	0	UM Kakenge	Mobile
2013-07-12	Male	20	Neg	Done	Neg	Not done			Done	Neg	Done	Neg	Pos	Pos	Done	Neg	Done	Neg	Neg	Neg	0	0	0	0	UM Kakenge	Mobile
2013-07-12	Male	34	Neg	Done	Neg	Not done			Not done		Done	Neg	Pos	Pos	Done	Neg	Done	Neg	Neg	Neg	0	0	0	0	UM Kakenge	Mobile
2013-07-12	Male	15	Pos	Done	Neg	Not done			Done	Neg	Done	Neg	Neg	Neg	Not done		Not done		Pos	Neg	1+	0	0	0	UM Kakenge	Mobile
2013-07-13	Male	19	Pos	Done	Neg	Not done			Done	Neg	Done	Neg	Neg	Neg	Not done		Not done		Pos	Pos	0	0	2+	2+	UM Kakenge	Mobile
2013-07-13	Male	41	Neg	Done	Neg	Not done			Not done		Done	Neg	Pos	Neg	Done	Neg	Done	Neg	Neg	Neg	0	0	0	0	UM Kakenge	Mobile
2013-07-13	Female	33	Neg	Done	Neg	Not done			Not done		Done	Neg	Pos	Pos	Done	Neg	Done	Neg	Neg	Neg	0	0	0	0	UM Kakenge	Mobile
2013-07-14	Male	7	Pos	Done	Neg	Not done			Not done		Done	Neg	Pos	Neg	Done	Neg	Done	Neg	Neg	Neg	0	0	0	0	UM Kakenge	Mobile
2013-07-14	Female	13	Pos	Done	Neg	Not done			Not done		Done	Neg	Neg	Neg	Not done		Not done		Pos	Pos	0	0	1+	3+	UM Kakenge	Mobile
2013-07-14	Female	17	Neg	Done	Neg	Not done			Done	Neg	Done	Neg	Neg	Neg	Not done		Not done		Pos	Neg	2+	0	1+	0	UM Kakenge	Mobile
2013-07-14	Female	42	Neg	Done	Neg	Not done			Not done		Done	Neg	Neg	Neg	Not done		Not done		Pos	Pos	0	0	2+	3+	UM Kakenge	Mobile
2013-07-15	Female	23	Neg	Done	Neg	Not done			Not done		Done	Neg	Neg	Neg	Not done		Not done		Pos	Pos	1+	2+	0	0	UM Kakenge	Mobile
2013-07-15	Female	6	Pos	Done	Neg	Not done			Not done		Done	Neg	Neg	Neg	Not done		Not done		Pos	Pos	0	0	2+	2+	UM Kakenge	Mobile
2013-07-16	Male	81	Neg	Done	Neg	Not done			Not done		Done	Neg	Neg	Neg	Not done		Not done		Pos	Neg	1+	0	0	0	UM Kakenge	Mobile
2013-07-16	Male	46	Neg	Done	Neg	Not done			Not done		Done	Neg	Pos	Pos	Done	Pos	Done	Pos	Pos	Pos	0	0	2+	2+	UM Kakenge	Mobile
2013-07-16	Male	14	Pos	Done	Neg	Not done			Done	Neg	Done	Neg	Pos	Pos	Done	Neg	Done	Neg	Neg	Neg	0	0	0	0	UM Kakenge	Mobile
2013-07-16	Female	13	Pos	Done	Neg	Not done			Not done		Done	Neg	Neg	Neg	Not done		Not done		Pos	Neg	0	0	1+	0	UM Kakenge	Mobile
2013-07-16	Male	16	Pos	Done	Neg	Not done			Done	Neg	Done	Neg	Neg	Neg	Not done		Not done		Pos	Neg	0	0	1+	0	UM Kakenge	Mobile
2013-07-17	Female	35	Neg	Done	Neg	Done	Neg	1	Not done		Done	Neg	Pos	Pos	Done	Neg	Done	Neg	Neg	Neg	0	0	0	0	UM Kakenge	Mobile
2013-07-17	Female	25	Pos	Done	Neg	Not done			Not done		Done	Neg	Neg	Pos	Done	Neg	Done	Neg	Neg	Neg	0	0	0	0	UM Kakenge	Mobile
2013-07-17	Female	71	Pos	Done	Neg	Not done			Not done		Done	Neg	Neg	Pos	Done	Neg	Done	Neg	Neg	Neg	0	0	0	0	UM Kakenge	Mobile
2013-07-17	Female	42	Pos	Done	Neg	Not done			Not done		Done	Neg	Pos	Pos	Done	Neg	Done	Neg	Neg	Neg	0	0	0	0	UM Kakenge	Mobile
2013-07-17	Male	14	Pos	Done	Neg	Not done			Not done		Done	Neg	Neg	Neg	Not done		Not done		Pos	Neg	0	0	1+	0	UM Kakenge	Mobile
2013-07-17	Female	39	Pos	Done	Neg	Not done			Not done		Done	Neg	Neg	Neg	Not done		Not done		Neg	Neg	0	0	0	0	UM Kakenge	Mobile
2013-07-17	Male	63	Pos	Done	Neg	Not done			Not done		Done	Neg	Neg	Neg	Not done		Not done		Pos	Pos	0	0	1+	1+	UM Kakenge	Mobile
2013-07-18	Female	14	Pos	Done	Neg	Not done			Not done		Done	Neg	Pos	Pos	Done	Neg	Done	Neg	Neg	Neg	0	0	0	0	UM Kakenge	Mobile
2013-07-18	Male	16	Pos	Done	Neg	Not done			Not done		Done	Neg	Neg	Neg	Not done		Not done		Pos	Pos	0	0	2+	2+	UM Kakenge	Mobile
2013-07-19	Male	32	Pos	Done	Neg	Done	Neg	1	Not done		Done	Neg	Pos	Pos	Done	Neg	Done	Neg	Neg	Neg	0	0	0	0	UM Kakenge	Mobile
2013-07-19	Female	27	Neg	Done	Neg	Not done			Done	Neg	Done	Neg	Neg	Neg	Not done		Not done		Pos	Pos	2+	2+	1+	1+	UM Kakenge	Mobile
2013-07-19	Female	55	Pos	Done	Neg	Not done			Not done		Done	Neg	Neg	Neg	Not done		Not done		Pos	Pos	3+	3+	0	0	UM Kakenge	Mobile
2013-07-19	Female	10	Pos	Done	Neg	Not done			Not done		Done	Neg	Neg	Neg	Not done		Not done		Pos	Pos	4+	3+	0	0	UM Kakenge	Mobile
2013-07-19	Male	8	Pos	Done	Neg	Not done			Not done		Done	Neg	Pos	Pos	Done	Neg	Done	Neg	Pos	Neg	1+	0	2+	0	UM Kakenge	Mobile
2013-07-20	Male	9	Neg	Done	Neg	Not done			Done	Neg	Done	Neg	Neg	Neg	Not done		Not done		Pos	Pos	2+	3+	1+	1+	UM Kakenge	Mobile
2013-07-20	Male	20	Neg	Done	Neg	Not done			Not done		Done	Neg	Neg	Neg	Not done		Not done		Pos	Pos	0	1+	1+	1+	UM Kakenge	Mobile
2013-07-20	Male	8	Pos	Done	Neg	Not done			Not done		Done	Neg	Neg	Neg	Not done		Not done		Pos	Pos	1+	1+	0	1+	UM Kakenge	Mobile
2013-07-21	Female	7	Pos	Done	Neg	Not done			Not done		Done	Neg	Pos	Pos	Done	Neg	Done	Neg	Neg	Neg	0	0	0	0	UM Kakenge	Mobile
2013-07-21	Female	5	Neg	Done	Neg	Not done			Not done		Done	Neg	Neg	Neg	Not done		Not done		Pos	Pos	0	2+	0	0	UM Kakenge	Mobile
2013-07-21	Female	32	Neg	Done	Neg	Not done			Done	Neg	Done	Neg	Neg	Neg	Not done		Not done		Pos	Pos	0	0	2+	2+	UM Kakenge	Mobile
2013-07-19	Female	23	Pos	Done	Neg	Not done			Not done		Done	Neg	Neg	Neg	Not done		Not done		Pos	Pos	0	0	1+	2+	UM Kakenge	Mobile
2013-07-21	Female	15	Neg	Done	Neg	Not done			Not done		Done	Neg	Neg	Neg	Not done		Not done		Pos	Pos	1+	1+	0	0	UM Kakenge	Mobile
2013-07-21	Female	22	Pos	Done	Neg	Not done			Not done		Done	Neg	Pos	Pos	Done	Neg	Done	Neg	Pos	Pos	1+	1+	0	0	UM Kakenge	Mobile
2013-07-21	Female	13	Pos	Done	Neg	Not done			Not done		Done	Neg	Neg	Neg	Not done		Not done		Pos	Neg	2+	0	0	0	UM Kakenge	Mobile
2013-07-21	Male	30	Neg	Done	Neg	Done	Neg	2	Not done		Done	Neg	Pos	Pos	Done	Pos	Done	Pos	Neg	Neg	0	0	0	0	UM Kakenge	Mobile
2013-07-21	Female	60	Pos	Done	Neg	Not done			Not done		Done	Neg	Neg	Neg	Not done		Not done		Pos	Neg	1+	0	0	0	UM Kakenge	Mobile
2013-07-22	Female	70	Neg	Done	Neg	Not done			Not done		Done	Neg	Neg	Neg	Not done		Not done		Pos	Pos	0	0	1+	1+	UM Kakenge	Mobile
2013-07-22	Female	60	Neg	Done	Neg	Not done			Not done		Done	Neg	Pos	Pos	Done	Neg	Done	Neg	Neg	Neg	0	0	0	0	UM Kakenge	Mobile
2013-07-22	Female	33	Neg	Done	Neg	Not done			Not done		Done	Neg	Neg	Neg	Not done		Not done		Pos	Pos	2+	1+	1+	1+	UM Kakenge	Mobile
2013-07-22	Female	60	Neg	Done	Neg	Not done			Not done		Done	Neg	Neg	Neg	Not done		Not done		Pos	Pos	4+	3+	1+	1+	UM Kakenge	Mobile
2013-07-23	Male	65	Neg	Done	Neg	Not done			Not done		Done	Neg	Neg	Neg	Not done		Not done		Pos	Pos	0	0	2+	2+	UM Kakenge	Mobile
2013-07-23	Male	63	Neg	Done	Neg	Not done			Done	Neg	Done	Neg	Pos	Pos	Done	Neg	Done	Neg	Neg	Neg	0	0	0	0	UM Kakenge	Mobile
2013-07-23	Female	65	Neg	Done	Neg	Not done			Not done		Done	Neg	Neg	Neg	Not done		Not done		Pos	Pos	0	0	2+	2+	UM Kakenge	Mobile
2013-07-23	Male	8	Neg	Done	Neg	Done	Neg	2	Not done		Done	Neg	Pos	Pos	Done	Pos	Done	Pos	Pos	Pos	0	0	2+	1+	UM Kakenge	Mobile
2013-07-26	Male	24	Pos	Done	Neg	Not done			Not done		Done	Neg	Neg	Neg	Not done		Not done		Pos	Pos	0	0	1+	1+	UM Kakenge	Mobile
2013-07-26	Male	47	Neg	Done	Neg	Not done			Not done		Done	Neg	Pos	Neg	Done	Neg	Done	Neg	Neg	Neg	0	0	0	0	UM Kakenge	Mobile
2013-07-26	Female	37	Pos	Done	Neg	Not done			Done	Neg	Done	Neg	Pos	Pos	Done	Neg	Done	Neg	Neg	Neg	0	0	0	0	UM Kakenge	Mobile
2013-07-26	Female	32	Pos	Done	Neg	Not done			Done	Neg	Done	Neg	Neg	Neg	Not done		Not done		Pos	Pos	2+	1+	1+	1+	UM Kakenge	Mobile
2013-07-26	Male	58	Neg	Done	Neg	Not done			Done	Neg	Done	Neg	Pos	Pos	Done	Neg	Done	Neg	Neg	Neg	0	0	0	0	UM Kakenge	Mobile
2013-07-26	Female	25	Pos	Done	Neg	Not done			Not done		Done	Neg	Pos	Pos	Done	Neg	Done	Neg	Pos	Pos	0	3+	4+	4+	UM Kakenge	Mobile
2013-07-27	Male	21	Pos	Done	Neg	Not done			Not done		Done	Neg	Neg	Neg	Not done		Not done		Pos	Pos	0	0	2+	2+	UM Kakenge	Mobile
2013-07-27	Male	55	Neg	Done	Neg	Not done			Not done		Done	Neg	Pos	Pos	Done	Neg	Done	Neg	Neg	Neg	0	0	0	0	UM Kakenge	Mobile
2013-07-27	Male	7	Pos	Not done		Done	Neg	7	Done	Pos	Not done		Pos	Pos	Done	Pos	Done	Pos	Pos	Pos	3+	3+	3+	2+	UM Kakenge	Mobile
2013-05-27	Male	42	Neg	Done	Neg	Done	Neg	1	Not done		Done	Neg	Neg	Neg	Done	Neg	Done	Neg	Neg	Neg	0	0	0	0	HGR Kakenge	Fixed
2013-05-28	Female	38	Neg	Done	Neg	Not done			Not done		Done	Neg	Neg	Pos	Done	Neg	Done	Neg	Neg	Neg	0	0	0	0	HGR Kakenge	Fixed
2013-05-28	Male	27	Neg	Done	Neg	Not done			Not done		Done	Neg	Pos	Pos	Done	Neg	Done	Neg	Pos	Pos	2+	2+	2+	3+	HGR Kakenge	Fixed
2013-05-28	Male	15	Pos	Done	Neg	Not done			Not done		Done	Neg	Neg	Neg	Done	Neg	Done	Neg	Pos	Pos	2+	0	2+	4+	HGR Kakenge	Fixed
2013-05-31	Female	19	Pos	Done	Neg	Done	Neg	1	Not done		Done	Neg	Pos	Pos	Done	Pos	Done	Pos	Pos	Pos	1+	2+	0	0	HGR Kakenge	Fixed
2013-06-01	Female	29	Neg	Done	Neg	Not done			Not done		Done	Neg	Neg	Neg	Done	Pos	Done	Neg	Pos	Pos	2+	3+	3+	3+	HGR Kakenge	Fixed
2013-06-03	Male	30	Neg	Done	Neg	Not done			Not done		Done	Neg	Neg	Neg	Done	Neg	Done	Neg	Pos	Pos	0	0	2+	2+	HGR Kakenge	Fixed
2013-06-06	Male	18	Pos	Done	Neg	Not done			Not done		Not done		Neg	Neg	Done	Neg	Done	Neg	Pos	Pos	0	0	2+	2+	HGR Kakenge	Fixed
2013-06-07	Female	34	Neg	Done	Neg	Not done			Not done		Done	Neg	Neg	Neg	Done	Neg	Done	Neg	Pos	Pos	0	0	2+	1+	HGR Kakenge	Fixed
2013-06-07	Female	23	Pos	Done	Neg	Not done			Not done		Done	Neg	Neg	Neg	Done	Neg	Done	Neg	Pos	Pos	0	0	2+	2+	HGR Kakenge	Fixed
2013-06-10	Male	55	Pos	Done	Neg	Not done			Not done		Done	Neg	Pos	Pos	Done	Neg	Done	Neg	Neg	Neg	0	0	0	0	HGR Kakenge	Fixed
2013-06-12	Female	5	Neg	Done	Neg	Not done			Not done		Done	Neg	Neg	Neg	Done	Neg	Done	Neg	Pos	Pos	2+	2+	0	0	HGR Kakenge	Fixed
2013-06-17	Female	5	Pos	Done	Neg	Not done			Not done		Done	Neg	Pos	Pos	Done	Neg	Done	Neg	Neg	Neg	0	0	0	0	HGR Kakenge	Fixed
2013-06-21	Female	9	Pos	Done	Neg	Not done			Not done		Done	Neg	Pos	Pos	Done	Neg	Done	Neg	Pos	Pos	4+	3+	0	0	HGR Kakenge	Fixed
2013-06-21	Female	9	Pos	Done	Neg	Not done			Not done		Done	Neg	Pos	Pos	Done	Neg	Done	Neg	Pos	Pos	3+	3+	0	0	HGR Kakenge	Fixed
2013-06-03	Female	45	Pos	Done	Neg	Not done			Not done		Done	Neg	Neg	Neg	Not done		Not done		Pos	Pos	2+	0	0	2+	HGR Kakenge	Fixed
2013-07-08	Female	65	Neg	Done	Neg	Not done			Not done		Done	Neg	Neg	Neg	Not done		Not done		Pos	Pos	0	0	2+	2+	HGR Kakenge	Fixed
2013-07-09	Male	24	Neg	Done	Neg	Not done			Not done		Done	Neg	Pos	Pos	Not done		Not done		Pos	Pos	2+	2+	3+	3+	HGR Kakenge	Fixed
2013-07-10	Male	36	Neg	Done	Neg	Not done			Not done		Done	Neg	Neg	Neg	Not done		Not done		Pos	Pos	2+	1+	2+	1+	HGR Kakenge	Fixed
2013-07-20	Female	37	Pos	Done	Neg	Not done			Not done		Done	Neg	Neg	Neg	Not done		Not done		Pos	Pos	3+	2+	1+	1+	HGR Kakenge	Fixed
2013-07-29	Male	60	Neg	Done	Neg	Not done			Not done		Done	Neg	Pos	Pos	Done	Neg	Done	Neg	Neg	Neg	0	0	0	0	HGR Kakenge	Fixed
2013-05-24	Female	19	Neg	Done	Neg	Not done			Not done		Done	Neg	Pos	Pos	Done	Neg	Done	Neg	Pos	Pos	4+	1+	0	1+	HGR Lukalaba	Fixed
2013-05-24	Male	16	Neg	Done	Neg	Not done			Not done		Done	Neg	Pos	Pos	Done	Neg	Done	Neg	Pos	Pos	4+	3+	2+	2+	HGR Lukalaba	Fixed
2013-05-24	Female	38	Neg	Done	Neg	Not done			Not done		Done	Neg	Pos	Pos	Done	Neg	Done	Neg	Pos	Pos	2+	2+	2+	1+	HGR Lukalaba	Fixed
2013-05-24	Female	36	Neg	Done	Neg	Not done			Not done		Done	Neg	Neg	Neg	Done	Neg	Done	Neg	Pos	Neg	3+	0	2+	0	HGR Lukalaba	Fixed
2013-05-24	Female	27	Pos	Done	Neg	Not done			Not done		Done	Neg	Neg	Neg	Done	Neg	Done	Neg	Pos	Neg	3+	0	2+	0	HGR Lukalaba	Fixed
2013-05-24	Female	23	Neg	Done	Neg	Not done			Done	Neg	Done	Neg	Pos	Pos	Done	Neg	Done	Neg	Pos	Neg	2+	0	0	0	HGR Lukalaba	Fixed
2013-05-25	Female	28	Neg	Done	Neg	Not done			Not done		Done	Neg	Pos	Pos	Done	Neg	Done	Neg	Neg	Neg	0	0	0	0	HGR Lukalaba	Fixed
2013-05-27	Female	25	Pos	Done	Neg	Not done			Not done		Done	Neg	Neg	Neg	Done	Neg	Done	Neg	Pos	Neg	2+	0	1+	0	HGR Lukalaba	Fixed
2013-05-27	Male	38	Neg	Done	Neg	Done	Neg	641	Done	Neg	Done	Neg	Pos	Pos	Done	Pos	Done	Pos	Pos	Pos	3+	1+	3+	2+	HGR Lukalaba	Fixed
2013-05-27	Female	23	Neg	Done	Neg	Not done			Not done		Done	Neg	Neg	Neg	Done	Neg	Done	Neg	Pos	Neg	2+	0	0	0	HGR Lukalaba	Fixed
2013-05-27	Male	25	Neg	Done	Neg	Not done			Not done		Done	Neg	Neg	Neg	Done	Neg	Done	Neg	Pos	Neg	2+	0	1+	0	HGR Lukalaba	Fixed
2013-05-28	Female	8	Pos	Done	Neg	Not done			Not done		Done	Neg	Pos	Pos	Done	Neg	Done	Neg	Pos	Neg	1+	0	1+	0	HGR Lukalaba	Fixed
2013-05-28	Male	20	Neg	Done	Neg	Not done			Not done		Done	Neg	Pos	Pos	Done	Neg	Done	Neg	Pos	Pos	2+	1+	1+	2+	HGR Lukalaba	Fixed
2013-05-28	Female	58	Neg	Done	Neg	Not done			Not done		Done	Neg	Pos	Neg	Done	Neg	Done	Neg	Pos	Neg	0	0	2+	0	HGR Lukalaba	Fixed
2013-05-28	Female	25	Pos	Done	Neg	Not done			Not done		Done	Neg	Pos	Pos	Done	Neg	Done	Neg	Pos	Pos	4+	3+	3+	2+	HGR Lukalaba	Fixed
2013-05-28	Male	28	Pos	Done	Neg	Not done			Not done		Done	Neg	Neg	Pos	Done	Neg	Done	Neg	Neg	Neg	0	0	0	0	HGR Lukalaba	Fixed
2013-06-04	Female	23	Pos	Done	Neg	Done	Neg	4	Not done		Done	Neg	Pos	Pos	Done	Pos	Done	Pos	Pos	Pos	4+	4+	0	0	HGR Lukalaba	Fixed
2013-06-04	Female	3	Pos	Done	Neg	Not done			Not done		Done	Neg	Pos	Pos	Done	Neg	Done	Neg	Pos	Neg	0	0	2+	0	HGR Lukalaba	Fixed
2013-06-04	Male	26	Neg	Done	Neg	Not done			Not done		Done	Neg	Pos	Neg	Done	Neg	Done	Neg	Pos	Pos	2+	1+	1+	0	HGR Lukalaba	Fixed
2013-06-04	Female	21	Pos	Done	Neg	Not done			Not done		Done	Neg	Pos	Pos	Done	Neg	Done	Neg	Neg	Neg	0	0	0	0	HGR Lukalaba	Fixed
2013-06-04	Female	28	Neg	Done	Neg	Not done			Not done		Done	Neg	Pos	Pos	Done	Neg	Done	Neg	Neg	Neg	0	0	0	0	HGR Lukalaba	Fixed
2013-06-04	Female	23	Neg	Done	Neg	Not done			Not done		Done	Neg	Pos	Pos	Done	Neg	Done	Neg	Neg	Neg	0	0	0	0	HGR Lukalaba	Fixed
2013-06-04	Female	45	Neg	Done	Neg	Not done			Not done		Done	Neg	Neg	Neg	Done	Neg	Done	Neg	Pos	Neg	2+	0	0	0	HGR Lukalaba	Fixed
2013-06-04	Female	28	Pos	Done	Neg	Not done			Not done		Done	Neg	Pos	Pos	Done	Neg	Done	Neg	Neg	Neg	0	0	0	0	HGR Lukalaba	Fixed
2013-06-07	Male	50	Pos	Done	Neg	Not done			Not done		Not done		Neg	Neg	Done	Neg	Done	Neg	Pos	Pos	3+	2+	0	0	HGR Lukalaba	Fixed
2013-06-07	Female	13	Pos	Done	Neg	Not done			Done	Neg	Not done		Pos	Pos	Done	Neg	Done	Neg	Neg	Neg	0	0	0	0	HGR Lukalaba	Fixed
2013-06-07	Female	5	Pos	Done	Neg	Not done			Not done		Not done		Neg	Neg	Done	Neg	Done	Neg	Pos	Pos	0	0	4+	4+	HGR Lukalaba	Fixed
2013-06-08	Female	51	Pos	Done	Neg	Not done			Not done		Not done		Neg	Neg	Done	Neg	Done	Neg	Pos	Pos	0	0	2+	2+	HGR Lukalaba	Fixed
2013-06-10	Female	28	Neg	Done	Neg	Not done			Not done		Not done		Pos	Pos	Done	Neg	Done	Neg	Pos	Pos	4+	4+	3+	2+	HGR Lukalaba	Fixed
2013-06-10	Female	20	Pos	Done	Neg	Not done			Not done		Not done		Neg	Neg	Done	Neg	Done	Neg	Pos	Pos	2+	2+	0	0	HGR Lukalaba	Fixed
2013-06-11	Male	15	Neg	Done	Neg	Not done			Not done		Not done		Pos	Pos	Done	Neg	Done	Neg	Pos	Pos	4+	4+	3+	2+	HGR Lukalaba	Fixed
2013-06-10	Male	81	Pos	Done	Neg	Not done			Not done		Not done		Pos	Neg	Done	Neg	Done	Neg	Pos	Pos	2+	2+	1+	0	HGR Lukalaba	Fixed
2013-06-10	Male	5	Pos	Done	Neg	Not done			Not done		Not done		Neg	Neg	Done	Neg	Done	Neg	Pos	Neg	1+	0	0	0	HGR Lukalaba	Fixed
2013-06-14	Male	15	Pos	Done	Neg	Not done			Not done		Not done		Neg	Neg	Done	Neg	Done	Neg	Pos	Neg	2+	0	0	0	HGR Lukalaba	Fixed
2013-06-11	Male	44	Neg	Done	Neg	Not done			Not done		Not done		Neg	Neg	Done	Neg	Done	Neg	Pos	Pos	2+	2+	1+	0	HGR Lukalaba	Fixed
2013-06-11	Male	75	Neg	Done	Neg	Not done			Not done		Not done		Neg	Neg	Done	Neg	Done	Neg	Pos	Pos	0	0	4+	4+	HGR Lukalaba	Fixed
2013-06-12	Male	13	Pos	Done	Neg	Not done			Not done		Not done		Pos	Pos	Done	Neg	Done	Neg	Pos	Pos	0	0	2+	2+	HGR Lukalaba	Fixed
2013-06-12	Female	36	Pos	Done	Neg	Not done			Not done		Not done		Neg	Neg	Done	Neg	Done	Neg	Pos	Pos	0	0	2+	2+	HGR Lukalaba	Fixed
2013-06-12	Female	11	Pos	Done	Neg	Not done			Not done		Not done		Pos	Pos	Done	Neg	Done	Neg	Neg	Neg	0	0	0	0	HGR Lukalaba	Fixed
2013-06-12	Female	2	Pos	Done	Neg	Not done			Not done		Not done		Neg	Neg	Done	Neg	Done	Neg	Pos	Pos	2+	2+	1+	2+	HGR Lukalaba	Fixed
2013-06-12	Female	3	Pos	Done	Neg	Not done			Not done		Not done		Pos	Pos	Done	Neg	Done	Neg	Neg	Neg	0	0	0	0	HGR Lukalaba	Fixed
2013-06-12	Female	47	Neg	Done	Neg	Not done			Not done		Not done		Pos	Pos	Done	Neg	Done	Neg	Pos	Pos	3+	3+	0	0	HGR Lukalaba	Fixed
2013-06-13	Female	35	Neg	Done	Neg	Not done			Not done		Not done		Pos	Pos	Done	Neg	Done	Neg	Neg	Neg	0	0	0	0	HGR Lukalaba	Fixed
2013-06-13	Female	60	Neg	Done	Neg	Not done			Not done		Not done		Neg	Neg	Done	Neg	Done	Neg	Pos	Pos	3+	3+	0	0	HGR Lukalaba	Fixed
2013-06-13	Male	23	Neg	Done	Neg	Not done			Not done		Not done		Pos	Pos	Done	Neg	Done	Neg	Neg	Neg	0	0	0	0	HGR Lukalaba	Fixed
2013-06-14	Female	50	Neg	Done	Neg	Not done			Not done		Not done		Pos	Pos	Done	Neg	Done	Neg	Neg	Neg	0	0	0	0	HGR Lukalaba	Fixed
2013-06-14	Female	26	Pos	Done	Neg	Not done			Not done		Not done		Pos	Neg	Done	Neg	Done	Neg	Pos	Neg	1+	0	0	0	HGR Lukalaba	Fixed
2013-06-14	Male	9	Pos	Done	Neg	Not done			Not done		Not done		Neg	Pos	Done	Neg	Done	Neg	Pos	Neg	1+	0	0	0	HGR Lukalaba	Fixed
2013-06-15	Male	13	Pos	Done	Neg	Not done			Not done		Not done		Neg	Neg	Done	Neg	Done	Neg	Pos	Pos	2+	2+	1+	0	HGR Lukalaba	Fixed
2013-06-15	Male	35	Pos	Done	Neg	Done	Neg	1	Not done		Not done		Pos	Pos	Done	Pos	Done	Pos	Pos	Pos	2+	1+	1+	1+	HGR Lukalaba	Fixed
2013-06-17	Female	15	Pos	Done	Neg	Not done			Not done		Not done		Neg	Neg	Done	Neg	Done	Neg	Pos	Pos	2+	2+	1+	1+	HGR Lukalaba	Fixed
2013-06-18	Male	14	Neg	Done	Neg	Not done			Not done		Not done		Neg	Neg	Done	Neg	Done	Neg	Pos	Pos	2+	1+	1+	0	HGR Lukalaba	Fixed
2013-06-18	Male	2	Pos	Done	Neg	Not done			Not done		Not done		Pos	Pos	Done	Neg	Done	Neg	Neg	Neg	0	0	0	0	HGR Lukalaba	Fixed
2013-06-19	Female	4	Pos	Done	Neg	Not done			Not done		Not done		Pos	Pos	Done	Neg	Done	Neg	Neg	Neg	0	0	0	0	HGR Lukalaba	Fixed
2013-06-20	Female	19	Pos	Done	Neg	Not done			Not done		Not done		Neg	Neg	Done	Neg	Done	Neg	Pos	Pos	0	0	2+	2+	HGR Lukalaba	Fixed
2013-08-06	Female	40	Pos	Done	Neg	Not done			Not done		Done	Neg	Neg	Neg	Not done		Not done		Pos	Pos	1+	1+	0	0	HGR Lukalaba	Fixed
2013-08-06	Female	28	Pos	Done	Neg	Not done			Not done		Done	Neg	Neg	Neg	Not done		Not done		Pos	Pos	0	0	2+	2+	HGR Lukalaba	Fixed
2013-08-06	Male	5	Pos	Done	Neg	Not done			Not done		Done	Neg	Neg	Neg	Not done		Not done		Pos	Pos	0	0	1+	1+	HGR Lukalaba	Fixed
2013-08-07	Female	16	Neg	Done	Neg	Not done			Not done		Done	Neg	Neg	Neg	Not done		Not done		Pos	Pos	2+	2+	1+	1+	HGR Lukalaba	Fixed
2013-08-06	Female	20	Neg	Done	Neg	Not done			Not done		Done	Neg	Neg	Neg	Done	Neg	Done	Neg	Pos	Pos	3+	2+	2+	2+	HGR Lukalaba	Fixed
2013-08-08	Female	26	Neg	Done	Neg	Not done			Not done		Done	Neg	Pos	Pos	Done	Neg	Done	Neg	Neg	Neg	0	0	0	0	HGR Lukalaba	Fixed
2013-08-07	Female	28	Neg	Done	Neg	Not done			Not done		Done	Neg	Neg	Pos	Done	Neg	Done	Neg	Pos	Pos	1+	1+	2+	1+	HGR Lukalaba	Fixed
2013-08-07	Female	36	Neg	Done	Neg	Not done			Not done		Done	Neg	Pos	Pos	Done	Neg	Done	Neg	Neg	Neg	0	0	0	0	HGR Lukalaba	Fixed
2013-08-08	Female	39	Pos	Done	Neg	Not done			Not done		Done	Neg	Neg	Neg	Not done		Not done		Pos	Pos	2+	2+	0	0	HGR Lukalaba	Fixed
2013-08-09	Female	37	Neg	Done	Neg	Not done			Not done		Done	Neg	Neg	Neg	Not done		Not done		Pos	Pos	0	0	2+	2+	HGR Lukalaba	Fixed
2013-08-09	Female	1	Pos	Done	Neg	Not done			Not done		Done	Neg	Neg	Neg	Not done		Not done		Pos	Pos	2+	2+	0	0	HGR Lukalaba	Fixed
2013-08-07	Female	20	Neg	Done	Neg	Not done			Not done		Done	Neg	Neg	Pos	Not done		Not done		Pos	Pos	4+	4+	4+	4+	HGR Lukalaba	Fixed
2013-08-09	Male	46	Neg	Done	Neg	Not done			Not done		Done	Neg	Pos	Pos	Done	Neg	Done	Neg	Neg	Neg	0	0	0	0	HGR Lukalaba	Fixed
2013-05-24	Female	20	Neg	Done	Neg	Not done			Not done		Done	Neg	Pos	Pos	Done	Neg	Done	Neg	Pos	Neg	1+	0	1+	0	HGR Lukalaba	Fixed
2013-05-16	Male	48	Pos	Done	Neg	Done	Neg	2	Not done		Done	Neg	Pos	Pos	Done	Pos	Done	Pos	Pos	Pos	0	0	2+	2+	UM Miabi	Mobile
2013-05-16	Male	67	Neg	Done	Neg	Not done			Not done		Done	Neg	Pos	Pos	Done	Neg	Done	Neg	Neg	Neg	0	0	0	0	UM Miabi	Mobile
2013-05-16	Male	55	Neg	Done	Neg	Not done			Not done		Done	Neg	Pos	Pos	Done	Neg	Done	Neg	Neg	Neg	0	0	0	0	UM Miabi	Mobile
2013-05-16	Female	55	Neg	Done	Neg	Not done			Not done		Done	Neg	Pos	Pos	Done	Neg	Done	Neg	Neg	Neg	0	0	0	0	UM Miabi	Mobile
2013-06-14	Female	43	Pos	Done	Neg	Not done			Not done		Not done		Pos	Pos	Done	Neg	Done	Neg	Neg	Neg	0	0	0	0	UM Miabi	Mobile
2013-06-14	Female	46	Neg	Done	Neg	Not done			Not done		Not done		Neg	Neg	Not done		Not done		Pos	Pos	0	0	1+	1+	UM Miabi	Mobile
2013-05-17	Male	10	Pos	Done	Neg	Not done			Not done		Done	Neg	Pos	Pos	Done	Neg	Done	Neg	Neg	Neg	0	0	0	0	UM Miabi	Mobile
2013-05-18	Female	24	Neg	Done	Neg	Not done			Done	Neg	Done	Neg	Pos	Pos	Done	Neg	Done	Neg	Neg	Neg	0	0	0	0	UM Miabi	Mobile
2013-05-18	Male	26	Neg	Done	Neg	Not done			Not done		Done	Neg	Pos	Pos	Done	Pos	Done	Pos	Neg	Neg	0	0	0	0	UM Miabi	Mobile
2013-05-18	Female	25	Neg	Done	Neg	Not done			Not done		Done	Neg	Neg	Neg	Done	Neg	Done	Neg	Pos	Pos	2+	2+	2+	2+	UM Miabi	Mobile
2013-05-18	Female	32	Neg	Done	Neg	Not done			Not done		Done	Neg	Pos	Pos	Done	Pos	Done	Pos	Neg	Neg	0	0	0	0	UM Miabi	Mobile
2013-05-16	Male	20	Neg	Done	Neg	Not done			Not done		Done	Neg	Pos	Pos	Done	Neg	Done	Neg	Neg	Neg	0	0	0	0	UM Miabi	Mobile
2013-05-18	Male	40	Neg	Done	Neg	Not done			Not done		Done	Neg	Pos	Pos	Done	Pos	Done	Pos	Neg	Neg	0	0	0	0	UM Miabi	Mobile
2013-05-16	Male	7	Pos	Done	Neg	Not done			Done	Neg	Done	Neg	Pos	Pos	Done	Neg	Done	Neg	Pos	Pos	2+	2+	2+	2+	UM Miabi	Mobile
2013-05-16	Female	16	Neg	Done	Neg	Not done			Not done		Done	Neg	Pos	Pos	Done	Neg	Done	Neg	Neg	Neg	0	0	0	0	UM Miabi	Mobile
2013-05-16	Female	25	Neg	Done	Neg	Not done			Not done		Done	Neg	Pos	Pos	Done	Neg	Done	Neg	Neg	Neg	0	0	0	0	UM Miabi	Mobile
2013-05-16	Female	45	Neg	Done	Neg	Done	Neg	2	Not done		Done	Neg	Pos	Pos	Done	Pos	Done	Pos	Pos	Pos	3+	3+	0	0	UM Miabi	Mobile
2013-05-17	Female	70	Neg	Done	Neg	Not done			Not done		Done	Neg	Neg	Neg	Not done		Not done		Pos	Pos	0	0	3+	3+	UM Miabi	Mobile
2013-05-19	Male	10	Pos	Done	Neg	Not done			Not done		Done	Neg	Neg	Neg	Not done		Not done		Pos	Pos	1+	1+	0	0	UM Miabi	Mobile
2013-05-17	Female	67	Neg	Done	Neg	Not done			Not done		Done	Neg	Pos	Pos	Done	Neg	Done	Neg	Neg	Neg	0	0	0	0	UM Miabi	Mobile
2013-05-19	Female	12	Pos	Done	Neg	Not done			Done	Neg	Done	Neg	Pos	Pos	Done	Neg	Done	Neg	Neg	Neg	0	0	0	0	UM Miabi	Mobile
2013-05-20	Male	26	Pos	Done	Neg	Not done			Not done		Done	Neg	Pos	Pos	Done	Pos	Done	Pos	Pos	Pos	4+	4+	3+	3+	UM Miabi	Mobile
2013-05-20	Male	22	Neg	Done	Neg	Not done			Not done		Done	Neg	Pos	Pos	Done	Neg	Done	Neg	Neg	Neg	0	0	0	0	UM Miabi	Mobile
2013-05-17	Male	60	Pos	Done	Neg	Not done			Not done		Done	Neg	Neg	Neg	Done	Neg	Done	Neg	Pos	Pos	2+	2+	0	0	UM Miabi	Mobile
2013-05-20	Female	45	Neg	Done	Neg	Not done			Not done		Done	Neg	Neg	Neg	Not done		Not done		Pos	Pos	0	0	2+	2+	UM Miabi	Mobile
2013-05-21	Male	61	Neg	Done	Neg	Not done			Not done		Done	Neg	Pos	Neg	Not done		Not done		Neg	Neg	0	0	0	0	UM Miabi	Mobile
2013-05-21	Male	55	Neg	Done	Neg	Not done			Not done		Done	Neg	Neg	Neg	Not done		Not done		Pos	Pos	0	0	2+	2+	UM Miabi	Mobile
2013-05-21	Female	52	Neg	Done	Neg	Not done			Not done		Done	Neg	Neg	Neg	Not done		Not done		Pos	Pos	1+	1+	0	0	UM Miabi	Mobile
2013-05-21	Female	24	Pos	Done	Neg	Not done			Not done		Done	Neg	Neg	Neg	Not done		Not done		Pos	Pos	0	0	1+	1+	UM Miabi	Mobile
2013-05-21	Male	2	Pos	Done	Neg	Not done			Not done		Done	Neg	Pos	Pos	Done	Pos	Done	Pos	Neg	Neg	0	0	0	0	UM Miabi	Mobile
2013-05-21	Female	39	Pos	Done	Neg	Not done			Not done		Done	Neg	Pos	Pos	Done	Neg	Done	Neg	Pos	Pos	2+	2+	2+	2+	UM Miabi	Mobile
2013-05-21	Female	23	Pos	Done	Neg	Not done			Not done		Done	Neg	Pos	Pos	Done	Neg	Done	Neg	Pos	Pos	4+	3+	2+	3+	UM Miabi	Mobile
2013-05-21	Male	7	Pos	Done	Neg	Not done			Not done		Done	Neg	Pos	Pos	Done	Pos	Done	Pos	Pos	Pos	4+	4+	3+	3+	UM Miabi	Mobile
2013-05-21	Male	24	Neg	Done	Neg	Not done			Done	Neg	Done	Neg	Pos	Pos	Done	Pos	Done	Pos	Neg	Neg	0	0	0	0	UM Miabi	Mobile
2013-05-22	Male	55	Neg	Done	Neg	Not done			Not done		Done	Neg	Neg	Neg	Not done		Not done		Pos	Pos	2+	3+	0	0	UM Miabi	Mobile
2013-05-22	Female	19	Pos	Done	Neg	Not done			Not done		Done	Neg	Neg	Neg	Not done		Not done		Pos	Pos	0	0	2+	0	UM Miabi	Mobile
2013-05-22	Female	23	Neg	Done	Neg	Not done			Not done		Done	Neg	Neg	Neg	Not done		Not done		Pos	Pos	0	0	2+	2+	UM Miabi	Mobile
2013-05-23	Male	17	Not done	Done	Neg	Not done			Not done		Done	Neg	Pos	Pos	Done	Neg	Done	Neg	Pos	Pos	1+	2+	2+	1+	UM Miabi	Mobile
2013-05-23	Female	12	Pos	Done	Neg	Not done			Not done		Done	Neg	Pos	Pos	Done	Neg	Done	Neg	Neg	Neg	0	0	0	0	UM Miabi	Mobile
2013-05-23	Male	32	Neg	Done	Neg	Not done			Not done		Done	Neg	Neg	Neg	Not done		Not done		Pos	Pos	0	0	2+	2+	UM Miabi	Mobile
2013-05-23	Female	40	Neg	Done	Neg	Not done			Not done		Done	Neg	Pos	Pos	Done	Neg	Done	Neg	Neg	Neg	0	0	0	0	UM Miabi	Mobile
2013-05-23	Female	34	Neg	Done	Neg	Not done			Not done		Done	Neg	Pos	Pos	Done	Neg	Done	Neg	Neg	Neg	0	0	0	0	UM Miabi	Mobile
2013-05-23	Female	7	Neg	Done	Neg	Not done			Not done		Done	Neg	Pos	Pos	Done	Neg	Done	Neg	Neg	Neg	0	0	0	0	UM Miabi	Mobile
2013-05-23	Female	12	Neg	Done	Neg	Not done			Not done		Done	Neg	Pos	Pos	Done	Neg	Done	Neg	Neg	Neg	0	0	0	0	UM Miabi	Mobile
2013-05-24	Male	56	Neg	Done	Neg	Not done			Not done		Done	Neg	Pos	Pos	Done	Neg	Done	Neg	Neg	Neg	0	0	0	0	UM Miabi	Mobile
2013-05-24	Male	37	Neg	Done	Neg	Not done			Not done		Done	Neg	Pos	Pos	Done	Pos	Done	Pos	Neg	Neg	0	0	0	0	UM Miabi	Mobile
2013-05-25	Male	54	Pos	Done	Neg	Not done			Not done		Done	Neg	Pos	Pos	Done	Neg	Done	Neg	Neg	Neg	0	0	0	0	UM Miabi	Mobile
2013-05-25	Female	54	Neg	Done	Neg	Not done			Not done		Done	Neg	Pos	Pos	Done	Neg	Done	Neg	Neg	Neg	0	0	0	0	UM Miabi	Mobile
2013-05-25	Female	34	Neg	Done	Neg	Not done			Not done		Done	Neg	Pos	Pos	Done	Neg	Done	Neg	Pos	Pos	1+	1+	2+	1+	UM Miabi	Mobile
2013-05-25	Male	35	Neg	Done	Neg	Not done			Done	Neg	Done	Neg	Pos	Pos	Done	Neg	Done	Neg	Neg	Neg	0	0	0	0	UM Miabi	Mobile
2013-05-26	Male	22	Pos	Done	Neg	Not done			Not done		Done	Neg	Neg	Neg	Not done		Not done		Pos	Pos	3+	3+	0	0	UM Miabi	Mobile
2013-06-12	Female	21	Neg	Done	Neg	Not done			Not done		Not done		Pos	Pos	Done	Neg	Done	Neg	Neg	Neg	0	0	0	0	UM Miabi	Mobile
2013-05-17	Male	20	Pos	Done	Neg	Not done			Not done		Done	Neg	Pos	Pos	Done	Neg	Done	Neg	Neg	Neg	0	0	0	0	UM Miabi	Mobile
2013-06-12	Male	21	Pos	Done	Neg	Not done			Not done		Not done		Neg	Neg	Not done		Not done		Pos	Pos	1+	0	1+	1+	UM Miabi	Mobile
2013-06-12	Female	40	Neg	Done	Neg	Not done			Not done		Not done		Neg	Neg	Not done		Not done		Pos	Pos	2+	1+	1+	0	UM Miabi	Mobile
2013-06-12	Male	53	Neg	Done	Neg	Not done			Not done		Not done		Neg	Neg	Not done		Not done		Pos	Pos	0	0	1+	1+	UM Miabi	Mobile
2013-06-12	Male	12	Pos	Done	Neg	Not done			Not done		Not done		Pos	Pos	Done	Neg	Done	Neg	Neg	Neg	0	0	0	0	UM Miabi	Mobile
2013-06-12	Male	15	Pos	Done	Neg	Not done			Not done		Not done		Pos	Pos	Done	Neg	Done	Neg	Neg	Neg	0	0	0	0	UM Miabi	Mobile
2013-06-12	Male	17	Neg	Done	Neg	Not done			Not done		Not done		Neg	Neg	Not done		Not done		Pos	Pos	1+	1+	0	0	UM Miabi	Mobile
2013-06-12	Female	12	Pos	Done	Neg	Not done			Not done		Done	Neg	Neg	Neg	Not done		Not done		Pos	Pos	0	0	2+	2+	UM Miabi	Mobile
2013-06-12	Male	9	Pos	Done	Neg	Not done			Not done		Done	Neg	Pos	Pos	Done	Pos	Done	Neg	Pos	Pos	2+	2+	4+	4+	UM Miabi	Mobile
2013-06-13	Male	45	Pos	Done	Neg	Not done			Not done		Not done		Neg	Neg	Not done		Not done		Pos	Pos	2+	2+	2+	3+	UM Miabi	Mobile
2013-05-17	Male	15	Pos	Done	Neg	Not done			Not done		Done	Neg	Pos	Pos	Done	Neg	Done	Neg	Pos	Pos	2+	2+	0	0	UM Miabi	Mobile
2013-06-13	Female	24	Pos	Done	Neg	Not done			Not done		Done	Neg	Pos	Pos	Done	Neg	Done	Neg	Neg	Neg	0	0	0	0	UM Miabi	Mobile
2013-06-13	Male	12	Pos	Done	Neg	Not done			Done	Neg	Not done		Pos	Pos	Done	Neg	Done	Neg	Neg	Neg	0	0	0	0	UM Miabi	Mobile
2013-06-13	Male	11	Pos	Done	Neg	Not done			Done	Neg	Done	Neg	Pos	Pos	Done	Neg	Done	Neg	Neg	Neg	0	0	0	0	UM Miabi	Mobile
2013-06-14	Female	50	Neg	Done	Neg	Not done			Not done		Not done		Pos	Pos	Done	Neg	Done	Neg	Neg	Neg	0	0	0	0	UM Miabi	Mobile
2013-06-14	Male	42	Neg	Done	Neg	Not done			Not done		Not done		Pos	Pos	Done	Neg	Done	Neg	Neg	Neg	0	0	0	0	UM Miabi	Mobile
2013-06-14	Female	46	Neg	Done	Neg	Not done			Not done		Not done		Neg	Neg	Not done		Not done		Pos	Pos	0	0	2+	2+	UM Miabi	Mobile
2013-06-15	Male	21	Neg	Done	Neg	Not done			Not done		Not done		Neg	Neg	Not done		Not done		Pos	Pos	1+	1+	1+	1+	UM Miabi	Mobile
2013-06-15	Female	54	Neg	Done	Neg	Not done			Not done		Not done		Pos	Pos	Done	Pos	Done	Pos	Pos	Pos	4+	4+	2+	2+	UM Miabi	Mobile
2013-06-17	Male	35	Pos	Done	Neg	Not done			Not done		Not done		Pos	Pos	Done	Neg	Done	Neg	Pos	Pos	4+	3+	2+	2+	UM Miabi	Mobile
2013-06-17	Male	60	Neg	Done	Neg	Not done			Not done		Not done		Pos	Pos	Done	Neg	Done	Neg	Neg	Neg	0	0	0	0	UM Miabi	Mobile
2013-06-17	Male	56	Neg	Done	Neg	Not done			Not done		Not done		Neg	Neg	Not done		Not done		Pos	Pos	1+	1+	0	0	UM Miabi	Mobile
2013-06-17	Male	25	Neg	Done	Neg	Not done			Not done		Not done		Pos	Pos	Done	Neg	Done	Neg	Pos	Pos	1+	1+	0	0	UM Miabi	Mobile
2013-06-17	Male	33	Neg	Done	Neg	Not done			Not done		Not done		Pos	Pos	Done	Neg	Done	Neg	Pos	Pos	2+	2+	0	0	UM Miabi	Mobile
2013-06-17	Male	22	Neg	Done	Neg	Not done			Not done		Not done		Pos	Pos	Done	Neg	Done	Neg	Neg	Neg	0	0	0	0	UM Miabi	Mobile
2013-06-17	Male	30	Pos	Done	Neg	Not done			Not done		Not done		Neg	Neg	Not done		Not done		Pos	Pos	1+	1+	1+	1+	UM Miabi	Mobile
2013-06-18	Female	65	Neg	Done	Neg	Not done			Not done		Not done		Pos	Pos	Done	Neg	Done	Neg	Neg	Neg	0	0	0	0	UM Miabi	Mobile
2013-06-18	Female	55	Neg	Done	Neg	Not done			Not done		Not done		Neg	Neg	Not done		Not done		Pos	Pos	2+	2+	0	0	UM Miabi	Mobile
2013-06-18	Female	11	Pos	Done	Neg	Not done			Not done		Not done		Neg	Neg	Not done		Not done		Pos	Pos	0	0	2+	2+	UM Miabi	Mobile
2013-06-18	Male	8	Pos	Done	Neg	Not done			Not done		Not done		Neg	Neg	Not done		Not done		Pos	Pos	2+	2+	2+	1+	UM Miabi	Mobile
2013-06-18	Male	11	Pos	Done	Neg	Not done			Not done		Not done		Neg	Neg	Not done		Not done		Pos	Pos	1+	1+	1+	0	UM Miabi	Mobile
2013-06-18	Female	7	Pos	Done	Neg	Not done			Not done		Not done		Pos	Pos	Done	Neg	Done	Neg	Neg	Neg	0	0	0	0	UM Miabi	Mobile
2013-06-18	Female	10	Neg	Done	Neg	Not done			Not done		Not done		Pos	Pos	Done	Neg	Done	Neg	Neg	Neg	0	0	0	0	UM Miabi	Mobile
2013-06-18	Male	11	Pos	Done	Neg	Not done			Not done		Not done		Pos	Neg	Not done		Not done		Pos	Pos	0	0	1+	1+	UM Miabi	Mobile
2013-06-18	Female	13	Pos	Done	Neg	Not done			Done	Neg	Not done		Pos	Pos	Done	Neg	Done	Neg	Neg	Neg	0	0	0	0	UM Miabi	Mobile
2013-06-18	Male	12	Pos	Done	Neg	Not done			Not done		Not done		Pos	Pos	Done	Neg	Done	Neg	Neg	Neg	0	0	0	0	UM Miabi	Mobile
2013-06-18	Male	13	Pos	Done	Neg	Not done			Not done		Not done		Pos	Pos	Done	Neg	Done	Neg	Neg	Neg	0	0	0	0	UM Miabi	Mobile
2013-06-18	Female	46	Pos	Done	Neg	Not done			Not done		Not done		Neg	Neg	Not done		Not done		Pos	Pos	0	0	2+	2+	UM Miabi	Mobile
2013-06-18	Female	67	Pos	Done	Neg	Not done			Not done		Not done		Pos	Pos	Done	Neg	Done	Neg	Neg	Neg	0	0	0	0	UM Miabi	Mobile
2013-06-19	Female	39	Neg	Done	Neg	Not done			Not done		Not done		Neg	Neg	Not done		Not done		Pos	Pos	1+	1+	0	0	UM Miabi	Mobile
2013-06-19	Male	54	Neg	Done	Neg	Not done			Not done		Not done		Neg	Neg	Not done		Not done		Pos	Pos	0	0	2+	1+	UM Miabi	Mobile
2013-06-19	Female	28	Pos	Done	Neg	Not done			Not done		Not done		Pos	Pos	Done	Neg	Done	Neg	Pos	Pos	3+	3+	2+	2+	UM Miabi	Mobile
2013-06-19	Male	14	Pos	Done	Neg	Not done			Not done		Not done		Neg	Neg	Not done		Not done		Pos	Pos	0	0	1+	1+	UM Miabi	Mobile
2013-06-19	Female	14	Pos	Done	Neg	Not done			Not done		Not done		Neg	Neg	Not done		Not done		Pos	Pos	1+	1+	1+	1+	UM Miabi	Mobile
2013-06-19	Male	56	Neg	Done	Neg	Not done			Not done		Not done		Neg	Neg	Not done		Not done		Pos	Pos	0	0	1+	1+	UM Miabi	Mobile
2013-06-19	Male	53	Neg	Done	Neg	Not done			Not done		Not done		Neg	Neg	Not done		Not done		Pos	Pos	0	0	2+	2+	UM Miabi	Mobile
2013-06-22	Female	37	Neg	Done	Neg	Not done			Not done		Not done		Neg	Neg	Not done		Not done		Pos	Pos	4+	4+	2+	2+	UM Miabi	Mobile
2013-06-20	Female	25	Pos	Done	Neg	Not done			Done	Neg	Not done		Neg	Neg	Not done		Not done		Pos	Pos	1+	1+	1+	2+	UM Miabi	Mobile
2013-06-20	Male	5	Pos	Done	Neg	Not done			Not done		Not done		Neg	Neg	Not done		Not done		Pos	Pos	1+	1+	0	1+	UM Miabi	Mobile
2013-06-20	Male	15	Pos	Done	Neg	Not done			Done	Neg	Not done		Neg	Neg	Not done		Not done		Pos	Pos	1+	1+	0	0	UM Miabi	Mobile
2013-06-21	Female	54	Neg	Done	Neg	Not done			Not done		Not done		Pos	Neg	Done	Neg	Done	Neg	Neg	Neg	0	0	0	0	UM Miabi	Mobile
2013-06-21	Male	6	Pos	Done	Neg	Not done			Not done		Not done		Neg	Neg	Not done		Not done		Pos	Pos	2+	1+	0	0	UM Miabi	Mobile
2013-06-21	Male	34	Neg	Done	Neg	Not done			Not done		Not done		Neg	Neg	Not done		Not done		Pos	Pos	1+	1+	1+	1+	UM Miabi	Mobile
2013-06-21	Female	68	Pos	Done	Neg	Not done			Not done		Not done		Neg	Neg	Not done		Not done		Pos	Pos	0	0	1+	2+	UM Miabi	Mobile
2013-06-21	Female	58	Neg	Done	Neg	Not done			Not done		Done	Neg	Pos	Pos	Done	Pos	Done	Pos	Neg	Neg	0	0	0	0	UM Miabi	Mobile
2013-06-21	Male	4	Pos	Done	Neg	Not done			Not done		Not done		Pos	Pos	Done	Neg	Done	Neg	Pos	Pos	2+	2+	0	0	UM Miabi	Mobile
2013-06-21	Female	9	Pos	Done	Neg	Not done			Not done		Not done		Pos	Pos	Done	Neg	Done	Neg	Neg	Neg	0	0	0	0	UM Miabi	Mobile
2013-06-21	Male	9	Pos	Done	Neg	Not done			Not done		Not done		Neg	Neg	Not done		Not done		Pos	Pos	0	0	2+	2+	UM Miabi	Mobile
2013-06-22	Male	38	Neg	Done	Neg	Not done			Not done		Not done		Neg	Neg	Not done		Not done		Pos	Pos	2+	1+	2+	1+	UM Miabi	Mobile
2013-06-22	Female	11	Neg	Done	Neg	Not done			Done	Neg	Not done		Neg	Neg	Not done		Not done		Pos	Pos	2+	2+	1+	0	UM Miabi	Mobile
2013-06-22	Female	56	Neg	Done	Neg	Not done			Not done		Not done		Neg	Neg	Not done		Not done		Pos	Pos	2+	2+	0	0	UM Miabi	Mobile
2013-06-22	Male	22	Neg	Done	Neg	Not done			Not done		Not done		Neg	Neg	Not done		Not done		Pos	Pos	1+	1+	0	0	UM Miabi	Mobile
2013-06-22	Male	19	Neg	Done	Neg	Not done			Not done		Not done		Neg	Neg	Not done		Not done		Pos	Pos	0	0	2+	1+	UM Miabi	Mobile
2013-06-22	Male	40	Neg	Done	Neg	Not done			Not done		Not done		Neg	Neg	Not done		Not done		Pos	Pos	1+	1+	0	0	UM Miabi	Mobile
2013-06-22	Male	19	Neg	Done	Neg	Done	Neg	6	Done	Neg	Done	Neg	Pos	Pos	Done	Neg	Done	Neg	Pos	Pos	1+	1+	1+	1+	UM Miabi	Mobile
2013-06-22	Male	51	Neg	Done	Neg	Not done			Not done		Not done		Pos	Pos	Done	Neg	Done	Neg	Pos	Pos	2+	2+	0	0	UM Miabi	Mobile
2013-06-22	Female	47	Neg	Done	Neg	Not done			Not done		Not done		Pos	Pos	Done	Neg	Done	Neg	Pos	Pos	0	0	2+	2+	UM Miabi	Mobile
2013-06-22	Male	39	Pos	Done	Neg	Not done			Not done		Not done		Pos	Pos	Done	Neg	Done	Neg	Pos	Pos	0	0	4+	4+	UM Miabi	Mobile
2013-06-22	Male	51	Neg	Done	Neg	Not done			Not done		Done	Neg	Pos	Pos	Done	Pos	Done	Pos	Neg	Neg	0	0	0	0	UM Miabi	Mobile
2013-06-24	Male	46	Pos	Done	Neg	Done	Pos	58	Done	Neg	Done	Neg	Pos	Pos	Done	Pos	Done	Pos	Pos	Pos	2+	2+	0	0	UM Miabi	Mobile
2013-07-14	Male	11	Pos	Done	Neg	Not done			Done	Neg	Done	Neg	Pos	Pos	Done	Neg	Done	Neg	Neg	Neg	0	0	0	0	UM Miabi	Mobile
2013-07-14	Female	9	Pos	Done	Neg	Not done			Not done		Done	Neg	Pos	Pos	Done	Neg	Done	Neg	Neg	Neg	0	0	0	0	UM Miabi	Mobile
2013-07-14	Female	19	Pos	Done	Neg	Not done			Not done		Done	Neg	Pos	Pos	Done	Neg	Done	Neg	Pos	Pos	1+	1+	0	0	UM Miabi	Mobile
2013-06-14	Female	14	Pos	Done	Neg	Not done			Done	Neg	Done	Neg	Neg	Neg	Not done		Not done		Pos	Pos	0	0	1+	1+	UM Miabi	Mobile
2013-07-14	Female	55	Neg	Done	Neg	Not done			Not done		Done	Neg	Neg	Neg	Not done		Not done		Pos	Pos	1+	1+	0	0	UM Miabi	Mobile
2013-07-14	Female	28	Neg	Done	Neg	Not done			Not done		Done	Neg	Neg	Neg	Not done		Not done		Pos	Pos	0	0	2+	2+	UM Miabi	Mobile
2013-07-15	Female	83	Pos	Done	Neg	Not done			Not done		Done	Neg	Pos	Pos	Done	Neg	Done	Neg	Neg	Neg	0	0	0	0	UM Miabi	Mobile
2013-07-15	Female	35	Neg	Done	Neg	Not done			Not done		Done	Neg	Neg	Neg	Not done		Not done		Pos	Pos	2+	2+	1+	1+	UM Miabi	Mobile
2013-07-15	Male	25	Pos	Done	Neg	Not done			Done	Neg	Done	Neg	Pos	Pos	Done	Pos	Done	Pos	Pos	Pos	0	0	2+	2+	UM Miabi	Mobile
2013-07-15	Male	12	Pos	Done	Neg	Not done			Not done		Done	Neg	Neg	Neg	Not done		Not done		Pos	Pos	1+	1+	1+	0	UM Miabi	Mobile
2013-07-17	Female	21	Neg	Done	Neg	Not done			Not done		Done	Neg	Neg	Neg	Not done		Not done		Pos	Pos	2+	2+	1+	1+	UM Miabi	Mobile
2013-07-17	Female	29	Neg	Done	Neg	Done	Neg	5	Not done		Done	Neg	Pos	Pos	Done	Pos	Done	Pos	Pos	Pos	1+	1+	2+	2+	UM Miabi	Mobile
2013-07-17	Female	52	Neg	Done	Neg	Not done			Not done		Done	Neg	Neg	Neg	Not done		Not done		Pos	Pos	2+	1+	1+	1+	UM Miabi	Mobile
2013-07-17	Male	29	Pos	Done	Neg	Done	Neg	3	Not done		Done	Pos	Pos	Pos	Done	Pos	Done	Pos	Pos	Pos	4+	4+	3+	3+	UM Miabi	Mobile
2013-07-17	Female	36	Pos	Not done		Done	Pos	7	Done	Pos	Not done		Pos	Pos	Done	Pos	Done	Pos	Pos	Pos	3+	3+	2+	2+	UM Miabi	Mobile
2013-07-17	Male	28	Neg	Done	Neg	Not done			Not done		Done	Neg	Pos	Pos	Done	Neg	Done	Neg	Pos	Pos	3+	3+	2+	2+	UM Miabi	Mobile
2013-07-17	Female	21	Pos	Done	Neg	Not done			Not done		Done	Neg	Pos	Pos	Done	Neg	Done	Neg	Pos	Pos	2+	1+	0	0	UM Miabi	Mobile
2013-07-17	Female	33	Neg	Done	Neg	Not done			Not done		Done	Neg	Pos	Pos	Done	Neg	Done	Neg	Pos	Pos	1+	1+	3+	3+	UM Miabi	Mobile
2013-07-17	Male	13	Pos	Done	Neg	Not done			Not done		Done	Neg	Pos	Pos	Done	Neg	Done	Neg	Neg	Neg	0	0	0	0	UM Miabi	Mobile
2013-07-17	Male	20	Neg	Done	Neg	Not done			Not done		Done	Neg	Pos	Pos	Done	Neg	Done	Neg	Pos	Pos	1+	1+	0	0	UM Miabi	Mobile
2013-07-18	Female	51	Neg	Done	Neg	Not done			Not done		Done	Neg	Pos	Pos	Done	Neg	Done	Neg	Neg	Neg	0	0	0	0	UM Miabi	Mobile
2013-07-18	Male	26	Pos	Done	Neg	Not done			Not done		Done	Neg	Neg	Neg	Not done		Not done		Pos	Pos	2+	2+	1+	1+	UM Miabi	Mobile
2013-07-18	Male	39	Pos	Done	Neg	Done	Neg	3	Not done		Done	Neg	Pos	Pos	Done	Pos	Done	Pos	Pos	Pos	2+	2+	2+	2+	UM Miabi	Mobile
2013-07-20	Female	13	Pos	Done	Neg	Not done			Done	Neg	Done	Neg	Neg	Neg	Not done		Not done		Pos	Pos	0	0	1+	1+	UM Miabi	Mobile
2013-07-19	Male	21	Neg	Done	Neg	Done	Neg	3	Not done		Done	Neg	Pos	Pos	Done	Pos	Done	Pos	Neg	Neg	0	0	0	0	UM Miabi	Mobile
2013-07-19	Female	12	Neg	Done	Neg	Not done			Done	Neg	Done	Neg	Pos	Pos	Done	Neg	Done	Neg	Neg	Neg	0	0	0	0	UM Miabi	Mobile
2013-07-19	Female	38	Pos	Done	Neg	Not done			Done	Neg	Done	Neg	Pos	Pos	Done	Neg	Done	Neg	Pos	Pos	1+	1+	0	0	UM Miabi	Mobile
2013-07-20	Female	13	Pos	Done	Neg	Not done			Done	Neg	Done	Neg	Neg	Neg	Not done		Not done		Pos	Pos	0	0	3+	3+	UM Miabi	Mobile
2013-07-20	Male	6	Pos	Done	Neg	Not done			Not done		Done	Neg	Neg	Neg	Not done		Not done		Pos	Pos	1+	2+	1+	1+	UM Miabi	Mobile
2013-07-20	Female	16	Pos	Done	Neg	Not done			Not done		Done	Neg	Neg	Neg	Not done		Not done		Pos	Pos	2+	2+	1+	1+	UM Miabi	Mobile
2013-07-20	Female	9	Pos	Done	Neg	Not done			Not done		Done	Neg	Pos	Pos	Done	Neg	Done	Neg	Neg	Neg	0	0	0	0	UM Miabi	Mobile
2013-07-20	Female	17	Pos	Done	Neg	Not done			Done	Neg	Done	Neg	Pos	Pos	Done	Pos	Done	Pos	Pos	Pos	1+	2+	2+	2+	UM Miabi	Mobile
2013-07-20	Male	13	Neg	Done	Neg	Not done			Not done		Done	Neg	Neg	Neg	Not done		Not done		Pos	Pos	1+	1+	0	0	UM Miabi	Mobile
2013-07-20	Male	13	Pos	Done	Neg	Not done			Not done		Done	Neg	Pos	Pos	Done	Neg	Done	Neg	Pos	Pos	2+	2+	0	0	UM Miabi	Mobile
2013-07-20	Female	9	Pos	Done	Neg	Done	Neg	1	Not done		Done	Pos	Pos	Pos	Done	Pos	Done	Pos	Neg	Neg	0	0	0	0	UM Miabi	Mobile
2013-07-21	Male	32	Pos	Done	Neg	Not done			Not done		Done	Neg	Neg	Neg	Not done		Not done		Pos	Pos	2+	2+	1+	1+	UM Miabi	Mobile
2013-07-21	Male	22	Pos	Done	Neg	Not done			Not done		Done	Neg	Neg	Neg	Not done		Not done		Pos	Pos	1+	1+	0	0	UM Miabi	Mobile
2013-07-21	Female	33	Neg	Done	Neg	Not done			Not done		Done	Neg	Neg	Neg	Not done		Not done		Pos	Pos	1+	1+	0	0	UM Miabi	Mobile
2013-07-21	Male	40	Pos	Done	Neg	Not done			Done	Neg	Done	Neg	Neg	Neg	Not done		Not done		Pos	Pos	0	0	2+	1+	UM Miabi	Mobile
2013-07-21	Female	36	Neg	Done	Neg	Not done			Done	Neg	Done	Neg	Neg	Neg	Not done		Not done		Pos	Pos	0	0	1+	1+	UM Miabi	Mobile
2013-07-23	Male	61	Pos	Done	Neg	Not done			Not done		Done	Neg	Neg	Neg	Not done		Not done		Pos	Pos	0	0	2+	2+	UM Miabi	Mobile
2013-07-24	Male	11	Pos	Done	Neg	Not done			Not done		Done	Neg	Neg	Neg	Not done		Not done		Pos	Pos	1+	1+	1+	0	UM Miabi	Mobile
2013-07-24	Male	9	Pos	Done	Neg	Not done			Not done		Done	Neg	Pos	Pos	Done	Neg	Done	Neg	Neg	Neg	0	0	0	0	UM Miabi	Mobile
2013-07-24	Female	13	Pos	Done	Neg	Not done			Not done		Done	Neg	Neg	Neg	Not done		Not done		Pos	Pos	1+	1+	0	0	UM Miabi	Mobile
2013-07-24	Male	48	Neg	Done	Neg	Not done			Not done		Done	Neg	Neg	Neg	Not done		Not done		Pos	Pos	2+	2+	2+	1+	UM Miabi	Mobile
2013-07-25	Female	36	Neg	Done	Neg	Not done			Not done		Done	Neg	Pos	Pos	Done	Neg	Done	Neg	Neg	Neg	0	0	0	0	UM Miabi	Mobile
2013-07-25	Female	6	Pos	Done	Neg	Not done			Not done		Done	Neg	Neg	Neg	Not done		Not done		Pos	Pos	1+	1+	0	0	UM Miabi	Mobile
2013-07-25	Female	28	Neg	Done	Neg	Done	Neg	2	Not done		Done	Neg	Pos	Pos	Done	Pos	Done	Pos	Neg	Neg	0	0	0	0	UM Miabi	Mobile
2013-07-25	Male	4	Neg	Done	Neg	Not done			Not done		Done	Neg	Neg	Neg	Not done		Not done		Pos	Pos	2+	2+	1+	0	UM Miabi	Mobile
2013-07-25	Female	11	Pos	Done	Neg	Not done			Not done		Done	Neg	Pos	Pos	Done	Neg	Done	Neg	Pos	Pos	3+	3+	3+	2+	UM Miabi	Mobile
2013-07-25	Male	28	Pos	Done	Neg	Not done			Not done		Done	Neg	Neg	Neg	Not done		Not done		Pos	Pos	1+	2+	1+	0	UM Miabi	Mobile
2013-07-25	Female	4	Neg	Done	Neg	Not done			Not done		Done	Neg	Neg	Neg	Not done		Not done		Pos	Pos	1+	1+	0	0	UM Miabi	Mobile
2013-07-25	Female	59	Neg	Done	Neg	Not done			Not done		Done	Neg	Pos	Pos	Done	Neg	Done	Neg	Neg	Neg	0	0	0	0	UM Miabi	Mobile
2013-07-25	Male	14	Neg	Done	Neg	Not done			Not done		Done	Neg	Neg	Neg	Not done		Not done		Pos	Pos	2+	2+	2+	1+	UM Miabi	Mobile
2013-07-25	Male	14	Pos	Done	Neg	Not done			Not done		Done	Neg	Neg	Neg	Not done		Not done		Pos	Pos	2+	1+	1+	0	UM Miabi	Mobile
2013-07-25	Male	13	Pos	Done	Neg	Not done			Not done		Done	Neg	Neg	Neg	Not done		Not done		Pos	Pos	2+	1+	1+	0	UM Miabi	Mobile
2013-07-25	Male	18	Pos	Done	Neg	Not done			Not done		Done	Neg	Neg	Neg	Not done		Not done		Pos	Pos	2+	2+	2+	2+	UM Miabi	Mobile
2013-07-25	Female	20	Pos	Done	Neg	Not done			Not done		Done	Neg	Neg	Neg	Not done		Not done		Pos	Pos	0	0	2+	2+	UM Miabi	Mobile
2013-07-26	Male	38	Neg	Not done		Done	Pos	1300	Done	Pos	Not done		Pos	Pos	Done	Pos	Done	Pos	Pos	Pos	2+	2+	2+	2+	UM Miabi	Mobile
2013-07-26	Male	43	Neg	Done	Neg	Not done			Not done		Done	Neg	Pos	Pos	Done	Neg	Done	Neg	Pos	Pos	0	0	1+	1+	UM Miabi	Mobile
2013-07-26	Male	33	Pos	Done	Neg	Done	Neg	1	Not done		Done	Neg	Pos	Pos	Done	Pos	Done	Pos	Pos	Pos	0	0	2+	1+	UM Miabi	Mobile
2013-07-29	Male	8	Pos	Done	Neg	Not done			Not done		Done	Neg	Neg	Neg	Not done		Not done		Pos	Pos	1+	1+	1+	0	UM Miabi	Mobile
2013-07-29	Male	6	Pos	Done	Neg	Done	Neg	1	Not done		Done	Neg	Pos	Pos	Done	Pos	Done	Pos	Neg	Neg	0	0	0	0	UM Miabi	Mobile
2013-07-29	Female	35	Pos	Done	Neg	Not done			Not done		Done	Neg	Neg	Neg	Not done		Not done		Pos	Pos	0	0	2+	2+	UM Miabi	Mobile
2013-07-29	Female	10	Neg	Done	Neg	Not done			Not done		Done	Neg	Neg	Neg	Not done		Not done		Pos	Pos	1+	2+	1+	1+	UM Miabi	Mobile
2013-07-29	Female	13	Pos	Done	Neg	Not done			Not done		Done	Neg	Neg	Neg	Not done		Not done		Pos	Pos	1+	1+	0	0	UM Miabi	Mobile
2013-07-29	Female	24	Pos	Done	Neg	Done	Neg	1	Not done		Done	Neg	Pos	Pos	Done	Pos	Done	Pos	Neg	Neg	0	0	0	0	UM Miabi	Mobile
2013-07-30	Female	67	Neg	Done	Neg	Not done			Not done		Done	Neg	Pos	Pos	Done	Neg	Done	Neg	Neg	Neg	0	0	0	0	UM Miabi	Mobile
2013-07-30	Male	33	Pos	Done	Neg	Not done			Not done		Done	Neg	Neg	Neg	Not done		Not done		Pos	Pos	0	0	1+	1+	UM Miabi	Mobile
2013-07-30	Male	4	Neg	Done	Neg	Not done			Not done		Done	Neg	Neg	Neg	Not done		Not done		Pos	Pos	0	0	2+	2+	UM Miabi	Mobile
2013-07-30	Female	19	Neg	Done	Neg	Not done			Not done		Done	Neg	Neg	Neg	Not done		Not done		Pos	Pos	2+	3+	2+	2+	UM Miabi	Mobile
2013-07-30	Male	14	Pos	Done	Neg	Not done			Not done		Done	Neg	Neg	Neg	Not done		Not done		Pos	Pos	1+	2+	0	0	UM Miabi	Mobile
2013-07-31	Female	16	Neg	Done	Neg	Not done			Not done		Done	Neg	Neg	Neg	Not done		Not done		Pos	Pos	2+	2+	1+	1+	UM Miabi	Mobile
2013-07-31	Female	47	Neg	Done	Neg	Not done			Not done		Done	Neg	Neg	Neg	Not done		Not done		Pos	Pos	1+	1+	0	1+	UM Miabi	Mobile
2013-07-31	Male	17	Neg	Done	Neg	Not done			Not done		Done	Neg	Neg	Neg	Not done		Not done		Pos	Pos	3+	2+	0	0	UM Miabi	Mobile
2013-07-31	Female	4	Pos	Done	Neg	Not done			Not done		Done	Neg	Neg	Neg	Not done		Not done		Pos	Pos	3+	1+	1+	1+	UM Miabi	Mobile
2013-07-31	Female	48	Pos	Done	Neg	Not done			Not done		Done	Neg	Pos	Pos	Done	Pos	Done	Pos	Pos	Pos	1+	1+	3+	3+	UM Miabi	Mobile
2013-07-31	Female	79	Neg	Done	Neg	Not done			Not done		Done	Neg	Neg	Neg	Not done		Not done		Pos	Pos	2+	2+	3+	3+	UM Miabi	Mobile
2013-07-31	Female	26	Pos	Done	Neg	Not done			Not done		Done	Neg	Neg	Neg	Not done		Not done		Pos	Pos	2+	2+	1+	1+	UM Miabi	Mobile
2013-08-02	Female	55	Neg	Done	Neg	Not done			Not done		Done	Neg	Neg	Neg	Not done		Not done		Pos	Pos	2+	2+	1+	1+	UM Miabi	Mobile
2013-08-02	Female	6	Pos	Done	Neg	Not done			Not done		Done	Neg	Neg	Neg	Not done		Not done		Pos	Pos	2+	2+	1+	1+	UM Miabi	Mobile
2013-08-02	Male	53	Neg	Done	Neg	Not done			Not done		Done	Neg	Neg	Neg	Not done		Not done		Pos	Pos	1+	0	1+	1+	UM Miabi	Mobile
2013-08-02	Male	15	Pos	Done	Neg	Not done			Not done		Done	Neg	Pos	Pos	Done	Neg	Done	Neg	Neg	Neg	0	0	0	0	UM Miabi	Mobile
2013-08-02	Female	12	Pos	Done	Neg	Not done			Not done		Done	Neg	Neg	Neg	Not done		Not done		Pos	Pos	1+	1+	0	0	UM Miabi	Mobile
2013-08-02	Male	8	Pos	Done	Neg	Not done			Not done		Done	Neg	Neg	Neg	Not done		Not done		Pos	Pos	1+	1+	1+	1+	UM Miabi	Mobile
2013-08-02	Female	50	Neg	Done	Neg	Not done			Not done		Done	Neg	Pos	Pos	Not done		Not done		Neg	Neg	0	0	0	0	UM Miabi	Mobile
2013-08-02	Female	13	Neg	Done	Neg	Not done			Not done		Done	Neg	Neg	Neg	Not done		Not done		Pos	Pos	2+	2+	1+	1+	UM Miabi	Mobile
2013-08-02	Female	41	Neg	Done	Neg	Done	Neg	2	Not done		Done	Neg	Pos	Pos	Done	Pos	Done	Pos	Pos	Pos	2+	2+	2+	3+	UM Miabi	Mobile
2013-08-02	Male	8	Pos	Done	Neg	Done	Neg	1	Not done		Done	Neg	Pos	Pos	Done	Pos	Done	Pos	Pos	Pos	1+	1+	2+	2+	UM Miabi	Mobile
2013-08-02	Female	63	Pos	Done	Neg	Not done			Not done		Done	Neg	Neg	Neg	Not done		Not done		Pos	Pos	0	0	4+	2+	UM Miabi	Mobile
2013-08-02	Male	14	Neg	Done	Neg	Not done			Not done		Done	Neg	Neg	Neg	Not done		Not done		Pos	Pos	3+	3+	2+	2+	UM Miabi	Mobile
2013-08-06	Female	49	Neg	Done	Neg	Not done			Not done		Done	Neg	Neg	Neg	Not done		Not done		Pos	Pos	2+	2+	1+	0	UM Miabi	Mobile
2013-08-06	Female	3	Pos	Done	Neg	Not done			Not done		Done	Neg	Neg	Neg	Not done		Not done		Pos	Pos	1+	1+	0	0	UM Miabi	Mobile
2013-08-07	Male	63	Neg	Done	Neg	Not done			Not done		Done	Neg	Pos	Pos	Done	Pos	Done	Pos	Pos	Pos	2+	2+	2+	1+	UM Miabi	Mobile
2013-08-07	Female	9	Pos	Done	Neg	Not done			Not done		Done	Neg	Pos	Pos	Done	Neg	Done	Neg	Neg	Neg	0	0	0	0	UM Miabi	Mobile
2013-08-07	Male	11	Pos	Done	Neg	Not done			Not done		Done	Neg	Neg	Neg	Not done		Not done		Pos	Pos	2+	2+	1+	1+	UM Miabi	Mobile
2013-08-07	Female	5	Pos	Done	Neg	Not done			Not done		Done	Neg	Neg	Neg	Not done		Not done		Pos	Pos	2+	2+	1+	1+	UM Miabi	Mobile
2013-08-07	Female	62	Neg	Done	Neg	Not done			Not done		Done	Neg	Pos	Pos	Done	Neg	Done	Neg	Neg	Neg	0	0	0	0	UM Miabi	Mobile
2013-08-07	Male	8	Pos	Done	Neg	Not done			Done	Neg	Done	Neg	Pos	Pos	Done	Neg	Done	Neg	Neg	Neg	0	0	0	0	UM Miabi	Mobile
2013-08-07	Female	16	Pos	Done	Neg	Not done			Not done		Done	Neg	Neg	Neg	Not done		Not done		Pos	Pos	0	0	2+	2+	UM Miabi	Mobile
2013-08-07	Female	24	Neg	Done	Neg	Not done			Not done		Done	Neg	Neg	Neg	Not done		Not done		Pos	Pos	3+	2+	3+	3+	UM Miabi	Mobile
2013-08-07	Female	7	Pos	Done	Neg	Not done			Not done		Done	Neg	Neg	Neg	Not done		Not done		Pos	Pos	0	0	2+	3+	UM Miabi	Mobile
2013-08-09	Male	11	Pos	Done	Neg	Not done			Done	Neg	Done	Neg	Neg	Neg	Not done		Not done		Pos	Pos	0	0	2+	2+	UM Miabi	Mobile
2013-08-09	Male	14	Pos	Done	Neg	Done	Neg	3	Not done		Done	Pos	Neg	Neg	Not done		Not done		Pos	Pos	2+	2+	2+	2+	UM Miabi	Mobile
2013-08-09	Male	5	Pos	Done	Neg	Not done			Not done		Done	Neg	Neg	Neg	Not done		Not done		Pos	Pos	1+	2+	0	1+	UM Miabi	Mobile
2013-08-09	Male	67	Neg	Done	Neg	Not done			Not done		Done	Neg	Neg	Neg	Not done		Not done		Pos	Pos	2+	2+	0	0	UM Miabi	Mobile
2013-08-09	Female	79	Neg	Done	Neg	Done	Neg	4	Not done		Done	Neg	Pos	Pos	Done	Pos	Done	Pos	Neg	Neg	0	0	0	0	UM Miabi	Mobile
2013-08-11	Female	41	Neg	Done	Neg	Not done			Not done		Done	Neg	Neg	Neg	Not done		Not done		Pos	Pos	2+	2+	1+	1+	UM Miabi	Mobile
2013-08-11	Male	6	Pos	Done	Neg	Not done			Done	Neg	Done	Neg	Pos	Pos	Done	Neg	Done	Neg	Pos	Pos	2+	3+	2+	2+	UM Miabi	Mobile
2013-08-11	Male	31	Pos	Done	Neg	Not done			Not done		Done	Neg	Neg	Neg	Not done		Not done		Pos	Pos	2+	3+	2+	2+	UM Miabi	Mobile
2013-08-11	Female	22	Pos	Done	Neg	Done	Neg	4	Done	Neg	Done	Pos	Pos	Pos	Done	Pos	Done	Pos	Pos	Pos	2+	2+	3+	3+	UM Miabi	Mobile
2013-08-11	Male	8	Pos	Done	Neg	Not done			Not done		Done	Neg	Pos	Pos	Done	Neg	Done	Neg	Pos	Pos	3+	3+	3+	3+	UM Miabi	Mobile
2013-08-11	Male	6	Pos	Done	Neg	Not done			Not done		Done	Neg	Neg	Neg	Not done		Not done		Pos	Pos	2+	1+	0	1+	UM Miabi	Mobile
2013-08-11	Female	3	Pos	Done	Neg	Not done			Not done		Done	Neg	Neg	Neg	Not done		Not done		Pos	Pos	3+	3+	2+	2+	UM Miabi	Mobile
2013-08-11	Female	16	Pos	Done	Neg	Not done			Not done		Done	Neg	Pos	Pos	Done	Neg	Done	Neg	Neg	Neg	0	0	0	0	UM Miabi	Mobile
2013-08-11	Female	10	Pos	Done	Neg	Not done			Not done		Done	Neg	Neg	Neg	Not done		Not done		Pos	Pos	2+	2+	2+	1+	UM Miabi	Mobile
2013-08-11	Female	33	Neg	Done	Neg	Not done			Not done		Done	Neg	Pos	Pos	Done	Neg	Done	Neg	Neg	Neg	0	0	0	0	UM Miabi	Mobile
2013-08-13	Female	44	Neg	Done	Neg	Not done			Not done		Done	Neg	Neg	Neg	Not done		Not done		Pos	Pos	0	0	1+	1+	UM Miabi	Mobile
2013-08-13	Female	54	Neg	Done	Neg	Not done			Not done		Done	Neg	Pos	Pos	Done	Neg	Done	Neg	Pos	Pos	0	0	2+	3+	UM Miabi	Mobile
2013-08-13	Female	37	Neg	Done	Neg	Not done			Not done		Done	Neg	Pos	Pos	Done	Neg	Done	Neg	Neg	Neg	0	0	0	0	UM Miabi	Mobile
2013-08-13	Female	10	Neg	Done	Neg	Not done			Not done		Done	Neg	Neg	Neg	Not done		Not done		Pos	Pos	2+	2+	0	1+	UM Miabi	Mobile
2013-08-13	Female	28	Neg	Done	Neg	Not done			Not done		Done	Neg	Pos	Pos	Done	Neg	Done	Neg	Pos	Pos	2+	2+	0	0	UM Miabi	Mobile
2013-08-13	Male	6	Pos	Done	Neg	Not done			Not done		Done	Neg	Neg	Neg	Not done		Not done		Pos	Pos	2+	2+	1+	0	UM Miabi	Mobile
2013-08-13	Female	5	Pos	Done	Neg	Not done			Not done		Done	Neg	Neg	Neg	Not done		Not done		Pos	Pos	1+	1+	1+	0	UM Miabi	Mobile
2013-08-13	Female	13	Neg	Done	Neg	Not done			Not done		Done	Neg	Pos	Pos	Done	Pos	Done	Pos	Pos	Pos	0	0	0	2+	UM Miabi	Mobile
2013-08-13	Male	7	Pos	Done	Neg	Not done			Not done		Done	Neg	Pos	Pos	Done	Neg	Done	Neg	Neg	Neg	0	0	0	0	UM Miabi	Mobile
2013-08-13	Female	37	Neg	Done	Neg	Not done			Not done		Done	Neg	Neg	Neg	Not done		Not done		Pos	Pos	3+	3+	3+	3+	UM Miabi	Mobile
2013-08-13	Female	39	Pos	Done	Neg	Not done			Not done		Done	Neg	Pos	Pos	Done	Neg	Done	Neg	Neg	Neg	0	0	0	0	UM Miabi	Mobile
2013-08-13	Male	61	Neg	Done	Neg	Not done			Not done		Done	Neg	Neg	Neg	Not done		Not done		Pos	Pos	2+	1+	1+	1+	UM Miabi	Mobile
2013-08-13	Female	51	Pos	Done	Pos	Done	Pos	63	Done	Pos	Done	Pos	Pos	Pos	Done	Pos	Done	Pos	Pos	Pos	3+	3+	2+	2+	UM Miabi	Mobile
2013-08-13	Female	39	Neg	Done	Neg	Not done			Not done		Done	Neg	Pos	Pos	Done	Pos	Done	Pos	Neg	Neg	0	0	0	0	UM Miabi	Mobile
2013-07-14	Male	55	Pos	Done	Neg	Not done			Not done		Done	Neg	Pos	Pos	Done	Neg	Done	Neg	Neg	Neg	0	0	0	0	UM Miabi	Mobile
2013-07-14	Male	23	Pos	Done	Neg	Not done			Not done		Done	Neg	Neg	Neg	Not done		Not done		Pos	Pos	1+	1+	1+	1+	UM Miabi	Mobile
2013-07-14	Male	25	Pos	Done	Neg	Not done			Not done		Done	Neg	Neg	Neg	Not done		Not done		Pos	Pos	1+	0	1+	2+	UM Miabi	Mobile
2013-07-14	Male	11	Pos	Done	Neg	Not done			Not done		Done	Neg	Pos	Pos	Done	Neg	Done	Neg	Neg	Neg	0	0	0	0	UM Miabi	Mobile
2013-07-14	Female	46	Pos	Done	Neg	Not done			Not done		Done	Neg	Pos	Pos	Done	Neg	Done	Neg	Pos	Pos	2+	2+	2+	2+	UM Miabi	Mobile
2013-07-14	Female	71	Pos	Done	Neg	Not done			Not done		Done	Neg	Pos	Pos	Done	Neg	Done	Neg	Neg	Neg	0	0	0	0	UM Miabi	Mobile
2013-07-14	Female	30	Pos	Done	Neg	Not done			Done	Neg	Done	Neg	Neg	Neg	Not done		Not done		Pos	Pos	2+	2+	2+	2+	UM Miabi	Mobile
2013-07-14	Female	33	Pos	Done	Neg	Not done			Not done		Done	Neg	Neg	Neg	Not done		Not done		Pos	Pos	2+	0	2+	2+	UM Miabi	Mobile
2013-07-15	Male	63	Pos	Done	Neg	Not done			Not done		Done	Neg	Pos	Pos	Done	Neg	Done	Neg	Neg	Neg	0	0	0	0	UM Miabi	Mobile
2013-07-15	Male	30	Pos	Done	Neg	Not done			Done	Neg	Done	Neg	Pos	Pos	Done	Neg	Done	Neg	Neg	Neg	0	0	0	0	UM Miabi	Mobile
2013-07-15	Female	74	Neg	Done	Neg	Not done			Not done		Done	Neg	Neg	Neg	Not done		Not done		Pos	Pos	0	0	1+	1+	UM Miabi	Mobile
2013-07-15	Male	32	Neg	Done	Neg	Not done			Not done		Done	Neg	Neg	Neg	Not done		Not done		Pos	Pos	0	0	2+	1+	UM Miabi	Mobile
2013-07-17	Female	26	Pos	Done	Neg	Not done			Done	Neg	Done	Neg	Pos	Pos	Done	Neg	Done	Neg	Neg	Neg	0	0	0	0	UM Miabi	Mobile
2013-07-17	Female	14	Neg	Done	Neg	Not done			Not done		Done	Neg	Pos	Pos	Done	Neg	Done	Neg	Neg	Neg	0	0	0	0	UM Miabi	Mobile
2013-07-17	Male	36	Pos	Done	Neg	Not done			Not done		Done	Neg	Pos	Pos	Done	Neg	Done	Neg	Pos	Pos	3+	3+	0	0	UM Miabi	Mobile
2013-07-17	Male	32	Pos	Done	Neg	Not done			Not done		Done	Neg	Pos	Pos	Done	Neg	Done	Neg	Neg	Neg	0	0	0	0	UM Miabi	Mobile
2013-07-17	Female	48	Neg	Done	Neg	Not done			Not done		Done	Neg	Pos	Pos	Done	Pos	Done	Pos	Neg	Neg	0	0	0	0	UM Miabi	Mobile
2013-07-18	Female	20	Neg	Done	Neg	Not done			Not done		Done	Neg	Pos	Pos	Done	Neg	Done	Neg	Neg	Neg	0	0	0	0	UM Miabi	Mobile
2013-07-18	Female	55	Pos	Done	Neg	Done	Neg	3	Done	Neg	Done	Pos	Pos	Pos	Done	Pos	Done	Pos	Pos	Pos	2+	2+	2+	3+	UM Miabi	Mobile
2013-07-18	Female	18	Pos	Done	Neg	Not done			Done	Neg	Done	Neg	Pos	Pos	Done	Neg	Done	Neg	Neg	Neg	0	0	0	0	UM Miabi	Mobile
2013-07-18	Male	28	Pos	Done	Neg	Not done			Not done		Done	Neg	Pos	Pos	Done	Neg	Done	Neg	Neg	Neg	0	0	0	0	UM Miabi	Mobile
2013-07-18	Male	16	Pos	Done	Neg	Not done			Not done		Done	Neg	Neg	Neg	Not done		Not done		Pos	Pos	1+	1+	0	0	UM Miabi	Mobile
2013-07-18	Male	37	Neg	Done	Neg	Done	Neg	3	Not done		Done	Neg	Pos	Pos	Done	Pos	Done	Pos	Neg	Neg	0	0	0	0	UM Miabi	Mobile
2013-07-18	Male	13	Pos	Done	Neg	Not done			Not done		Done	Neg	Neg	Neg	Not done		Not done		Pos	Pos	1+	1+	0	0	UM Miabi	Mobile
2013-07-18	Female	19	Pos	Done	Neg	Not done			Done	Neg	Done	Neg	Pos	Pos	Done	Neg	Done	Neg	Pos	Pos	3+	3+	0	0	UM Miabi	Mobile
2013-07-18	Female	66	Pos	Done	Neg	Not done			Not done		Done	Neg	Neg	Neg	Not done		Not done		Pos	Pos	0	0	2+	2+	UM Miabi	Mobile
2013-07-19	Female	40	Pos	Done	Neg	Not done			Done	Neg	Done	Neg	Pos	Pos	Done	Neg	Done	Neg	Pos	Pos	0	0	1+	1+	UM Miabi	Mobile
2013-07-20	Male	32	Pos	Done	Neg	Not done			Not done		Done	Neg	Neg	Neg	Not done		Not done		Pos	Pos	1+	1+	1+	1+	UM Miabi	Mobile
2013-07-20	Female	47	Pos	Done	Neg	Not done			Not done		Done	Neg	Neg	Neg	Not done		Not done		Pos	Pos	1+	1+	1+	1+	UM Miabi	Mobile
2013-07-20	Female	47	Pos	Done	Neg	Not done			Not done		Done	Neg	Neg	Neg	Not done		Not done		Pos	Pos	2+	2+	1+	1+	UM Miabi	Mobile
2013-07-20	Male	50	Neg	Done	Neg	Not done			Not done		Done	Neg	Pos	Pos	Done	Neg	Done	Neg	Neg	Neg	0	0	0	0	UM Miabi	Mobile
2013-07-20	Female	5	Pos	Done	Neg	Not done			Not done		Done	Neg	Pos	Pos	Done	Neg	Done	Neg	Neg	Neg	0	0	0	0	UM Miabi	Mobile
2013-07-20	Male	13	Pos	Done	Neg	Not done			Not done		Done	Neg	Neg	Neg	Not done		Not done		Pos	Pos	1+	1+	1+	1+	UM Miabi	Mobile
2013-07-21	Female	62	Neg	Done	Neg	Not done			Not done		Done	Neg	Neg	Neg	Not done		Not done		Pos	Pos	0	0	1+	2+	UM Miabi	Mobile
2013-07-21	Female	36	Neg	Done	Neg	Not done			Not done		Done	Neg	Pos	Pos	Done	Neg	Done	Neg	Neg	Neg	0	0	0	0	UM Miabi	Mobile
2013-07-21	Female	25	Pos	Done	Neg	Not done			Not done		Done	Neg	Neg	Neg	Not done		Not done		Pos	Pos	1+	1+	0	1+	UM Miabi	Mobile
2013-07-21	Male	15	Pos	Done	Neg	Not done			Not done		Done	Neg	Neg	Neg	Not done		Not done		Pos	Pos	2+	2+	1+	1+	UM Miabi	Mobile
2013-07-23	Male	55	Pos	Done	Neg	Not done			Not done		Done	Neg	Pos	Pos	Done	Neg	Done	Neg	Pos	Pos	1+	1+	2+	2+	UM Miabi	Mobile
2013-07-23	Male	14	Pos	Done	Neg	Not done			Not done		Done	Neg	Pos	Pos	Done	Neg	Done	Neg	Neg	Neg	0	0	0	0	UM Miabi	Mobile
2013-07-23	Male	12	Neg	Done	Neg	Not done			Not done		Done	Neg	Neg	Neg	Not done		Not done		Pos	Pos	2+	1+	1+	1+	UM Miabi	Mobile
2013-07-23	Female	46	Neg	Done	Neg	Not done			Not done		Done	Neg	Neg	Neg	Not done		Not done		Pos	Pos	2+	1+	1+	0	UM Miabi	Mobile
2013-07-23	Female	41	Pos	Done	Neg	Not done			Not done		Done	Neg	Neg	Neg	Not done		Not done		Pos	Neg	1+	0	1+	0	UM Miabi	Mobile
2013-07-23	Female	14	Neg	Done	Neg	Not done			Not done		Done	Neg	Neg	Neg	Not done		Not done		Pos	Pos	1+	1+	1+	1+	UM Miabi	Mobile
2013-07-23	Female	41	Neg	Done	Neg	Not done			Not done		Done	Neg	Neg	Neg	Not done		Not done		Pos	Pos	1+	1+	1+	0	UM Miabi	Mobile
2013-07-23	Female	11	Pos	Done	Neg	Not done			Not done		Done	Neg	Neg	Neg	Not done		Not done		Pos	Neg	1+	0	1+	0	UM Miabi	Mobile
2013-07-23	Male	19	Neg	Done	Neg	Not done			Not done		Done	Neg	Pos	Pos	Done	Neg	Done	Neg	Neg	Neg	0	0	0	0	UM Miabi	Mobile
2013-07-23	Female	41	Pos	Done	Neg	Done	Neg	1	Not done		Done	Neg	Pos	Pos	Done	Pos	Done	Pos	Pos	Pos	4+	4+	3+	2+	UM Miabi	Mobile
2013-07-23	Female	10	Pos	Done	Neg	Not done			Not done		Done	Neg	Pos	Pos	Done	Neg	Done	Neg	Neg	Neg	0	0	0	0	UM Miabi	Mobile
2013-07-23	Male	23	Pos	Done	Neg	Not done			Not done		Done	Neg	Pos	Pos	Done	Neg	Done	Neg	Neg	Neg	0	0	0	0	UM Miabi	Mobile
2013-07-23	Female	20	Neg	Done	Neg	Not done			Not done		Done	Neg	Pos	Pos	Done	Neg	Done	Neg	Neg	Neg	0	0	0	0	UM Miabi	Mobile
2013-07-23	Female	17	Pos	Done	Neg	Not done			Not done		Done	Neg	Neg	Neg	Not done		Not done		Pos	Pos	2+	2+	1+	2+	UM Miabi	Mobile
2013-07-23	Female	52	Neg	Done	Neg	Done	Neg	7	Not done		Done	Neg	Pos	Pos	Done	Pos	Done	Pos	Pos	Pos	4+	4+	3+	4+	UM Miabi	Mobile
2013-07-23	Female	40	Neg	Done	Neg	Not done			Not done		Done	Neg	Neg	Neg	Not done		Not done		Pos	Pos	0	0	1+	1+	UM Miabi	Mobile
2013-07-23	Female	21	Pos	Done	Neg	Not done			Not done		Done	Neg	Neg	Neg	Not done		Not done		Pos	Pos	0	2+	1+	1+	UM Miabi	Mobile
2013-07-23	Female	22	Pos	Done	Neg	Not done			Not done		Done	Neg	Neg	Neg	Not done		Not done		Pos	Pos	2+	1+	1+	0	UM Miabi	Mobile
2013-07-23	Male	33	Neg	Done	Neg	Not done			Not done		Done	Neg	Pos	Pos	Done	Neg	Done	Neg	Neg	Neg	0	0	0	0	UM Miabi	Mobile
2013-07-23	Female	12	Pos	Done	Neg	Not done			Not done		Done	Neg	Neg	Neg	Not done		Not done		Pos	Pos	2+	1+	1+	1+	UM Miabi	Mobile
2013-07-24	Female	68	Pos	Done	Neg	Done	Neg	2	Not done		Done	Neg	Pos	Pos	Done	Pos	Done	Pos	Pos	Pos	0	1+	2+	2+	UM Miabi	Mobile
2013-07-24	Male	53	Pos	Done	Neg	Done	Neg	3	Not done		Done	Neg	Pos	Pos	Done	Pos	Done	Pos	Pos	Pos	2+	1+	3+	4+	UM Miabi	Mobile
2013-07-24	Female	27	Pos	Done	Neg	Not done			Not done		Done	Neg	Neg	Neg	Not done		Not done		Pos	Pos	0	0	1+	1+	UM Miabi	Mobile
2013-07-24	Male	37	Neg	Done	Neg	Done	Neg	13	Not done		Done	Pos	Pos	Pos	Done	Pos	Done	Pos	Pos	Pos	4+	4+	4+	4+	UM Miabi	Mobile
2013-07-24	Female	14	Pos	Done	Neg	Not done			Not done		Done	Neg	Neg	Neg	Not done		Not done		Pos	Pos	2+	1+	2+	2+	UM Miabi	Mobile
2013-07-24	Female	21	Pos	Done	Neg	Not done			Not done		Done	Neg	Pos	Pos	Done	Neg	Done	Neg	Neg	Neg	0	0	0	0	UM Miabi	Mobile
2013-07-24	Female	28	Pos	Done	Neg	Not done			Not done		Done	Neg	Neg	Neg	Not done		Not done		Pos	Pos	0	0	1+	1+	UM Miabi	Mobile
2013-07-25	Male	28	Neg	Done	Neg	Not done			Not done		Done	Neg	Neg	Neg	Not done		Not done		Pos	Pos	1+	1+	1+	1+	UM Miabi	Mobile
2013-07-25	Male	30	Pos	Done	Neg	Not done			Not done		Done	Neg	Neg	Neg	Not done		Not done		Pos	Pos	0	0	1+	1+	UM Miabi	Mobile
2013-07-25	Male	39	Pos	Done	Neg	Done	Neg	2	Not done		Done	Neg	Pos	Pos	Done	Pos	Done	Pos	Pos	Pos	0	0	1+	2+	UM Miabi	Mobile
2013-07-25	Male	24	Neg	Done	Neg	Done	Neg	1	Not done		Done	Neg	Pos	Pos	Done	Pos	Done	Pos	Pos	Pos	0	0	1+	1+	UM Miabi	Mobile
2013-07-25	Male	8	Pos	Done	Neg	Not done			Not done		Done	Neg	Neg	Neg	Not done		Not done		Pos	Pos	0	0	2+	2+	UM Miabi	Mobile
2013-07-25	Female	11	Pos	Done	Neg	Not done			Not done		Done	Neg	Neg	Neg	Not done		Not done		Pos	Pos	1+	1+	1+	1+	UM Miabi	Mobile
2013-07-25	Male	12	Pos	Done	Neg	Not done			Not done		Done	Neg	Neg	Neg	Not done		Not done		Pos	Pos	3+	3+	3+	3+	UM Miabi	Mobile
2013-07-29	Male	14	Pos	Done	Neg	Not done			Not done		Done	Neg	Pos	Pos	Done	Neg	Done	Neg	Neg	Neg	0	0	0	0	UM Miabi	Mobile
2013-07-29	Female	29	Pos	Done	Neg	Not done			Not done		Done	Neg	Pos	Pos	Done	Neg	Done	Neg	Neg	Neg	0	0	0	0	UM Miabi	Mobile
2013-07-29	Female	55	Pos	Done	Neg	Not done			Not done		Done	Neg	Neg	Neg	Not done		Not done		Pos	Pos	1+	1+	1+	1+	UM Miabi	Mobile
2013-07-29	Female	33	Pos	Done	Neg	Not done			Not done		Done	Neg	Pos	Pos	Done	Neg	Done	Neg	Neg	Neg	0	0	0	0	UM Miabi	Mobile
2013-07-30	Male	13	Pos	Done	Neg	Not done			Not done		Done	Neg	Pos	Pos	Done	Neg	Done	Neg	Neg	Neg	0	0	0	0	UM Miabi	Mobile
2013-07-30	Female	21	Neg	Done	Neg	Not done			Not done		Done	Neg	Pos	Pos	Done	Neg	Done	Neg	Neg	Neg	0	0	0	0	UM Miabi	Mobile
2013-07-30	Female	15	Neg	Done	Neg	Not done			Not done		Done	Neg	Neg	Neg	Not done		Not done		Pos	Pos	3+	2+	2+	1+	UM Miabi	Mobile
2013-07-30	Female	6	Pos	Done	Neg	Not done			Not done		Done	Neg	Pos	Pos	Done	Neg	Done	Neg	Neg	Neg	0	0	0	0	UM Miabi	Mobile
2013-07-30	Male	61	Pos	Done	Neg	Not done			Not done		Done	Neg	Pos	Pos	Done	Neg	Done	Neg	Neg	Neg	0	0	0	0	UM Miabi	Mobile
2013-07-30	Female	14	Neg	Done	Neg	Not done			Not done		Done	Neg	Neg	Neg	Not done		Not done		Pos	Pos	0	0	4+	4+	UM Miabi	Mobile
2013-07-30	Female	5	Pos	Done	Neg	Not done			Not done		Done	Neg	Pos	Pos	Done	Neg	Done	Neg	Pos	Pos	1+	1+	0	0	UM Miabi	Mobile
2013-07-30	Male	9	Pos	Done	Neg	Not done			Not done		Done	Neg	Neg	Neg	Not done		Not done		Pos	Pos	0	1+	2+	2+	UM Miabi	Mobile
2013-07-30	Male	16	Pos	Done	Neg	Not done			Not done		Done	Neg	Neg	Neg	Not done		Not done		Pos	Pos	1+	1+	1+	1+	UM Miabi	Mobile
2013-07-30	Female	9	Pos	Done	Neg	Not done			Not done		Done	Neg	Pos	Pos	Done	Neg	Done	Neg	Pos	Pos	4+	4+	3+	2+	UM Miabi	Mobile
2013-07-30	Female	50	Pos	Done	Neg	Not done			Not done		Done	Neg	Pos	Pos	Done	Neg	Done	Neg	Pos	Pos	2+	2+	1+	1+	UM Miabi	Mobile
2013-07-30	Male	7	Pos	Done	Neg	Not done			Not done		Done	Neg	Pos	Pos	Done	Neg	Done	Neg	Pos	Pos	2+	2+	1+	1+	UM Miabi	Mobile
2013-07-30	Male	13	Pos	Done	Neg	Not done			Not done		Done	Neg	Pos	Pos	Done	Neg	Done	Neg	Pos	Pos	2+	1+	1+	1+	UM Miabi	Mobile
2013-07-30	Female	12	Pos	Done	Neg	Not done			Not done		Done	Neg	Pos	Pos	Done	Neg	Done	Neg	Pos	Pos	2+	2+	1+	1+	UM Miabi	Mobile
2013-07-31	Male	56	Neg	Done	Neg	Not done			Not done		Done	Neg	Neg	Neg	Not done		Not done		Pos	Pos	2+	2+	4+	4+	UM Miabi	Mobile
2013-07-31	Female	61	Neg	Done	Neg	Not done			Not done		Not done		Neg	Neg	Not done		Not done		Pos	Pos	2+	1+	1+	1+	UM Miabi	Mobile
2013-07-31	Female	55	Neg	Done	Neg	Not done			Done	Neg	Not done		Pos	Pos	Done	Neg	Done	Neg	Pos	Pos	1+	2+	0	0	UM Miabi	Mobile
2013-07-31	Female	38	Pos	Done	Neg	Not done			Not done		Not done		Neg	Neg	Not done		Not done		Pos	Pos	0	0	3+	3+	UM Miabi	Mobile
2013-07-31	Female	15	Pos	Done	Neg	Not done			Not done		Not done		Neg	Neg	Not done		Not done		Pos	Pos	3+	3+	3+	3+	UM Miabi	Mobile
2013-07-31	Male	13	Pos	Done	Neg	Not done			Not done		Not done		Pos	Pos	Done	Neg	Done	Neg	Pos	Pos	0	0	2+	3+	UM Miabi	Mobile
2013-07-31	Male	36	Pos	Done	Pos	Done	Pos	500	Done	Pos	Done	Pos	Pos	Pos	Done	Pos	Done	Pos	Pos	Pos	4+	4+	4+	4+	UM Miabi	Mobile
2013-08-02	Male	6	Pos	Done	Neg	Not done			Not done		Done	Neg	Neg	Neg	Not done		Not done		Pos	Pos	0	0	4+	3+	UM Miabi	Mobile
2013-08-02	Female	52	Neg	Done	Neg	Not done			Not done		Done	Neg	Pos	Pos	Done	Neg	Done	Neg	Neg	Neg	0	0	0	0	UM Miabi	Mobile
2013-08-02	Female	8	Pos	Done	Neg	Not done			Not done		Done	Neg	Neg	Neg	Not done		Not done		Pos	Pos	0	0	2+	2+	UM Miabi	Mobile
2013-08-02	Male	8	Pos	Done	Neg	Not done			Not done		Done	Neg	Pos	Pos	Done	Neg	Done	Neg	Pos	Pos	1+	1+	0	0	UM Miabi	Mobile
2013-08-02	Male	11	Pos	Done	Neg	Not done			Not done		Done	Neg	Neg	Neg	Not done		Not done		Pos	Pos	3+	3+	3+	3+	UM Miabi	Mobile
2013-08-02	Female	21	Pos	Done	Neg	Not done			Not done		Done	Neg	Pos	Pos	Done	Neg	Done	Neg	Pos	Pos	4+	4+	3+	3+	UM Miabi	Mobile
2013-08-02	Female	13	Pos	Done	Neg	Not done			Not done		Done	Neg	Neg	Neg	Not done		Not done		Pos	Pos	0	0	2+	2+	UM Miabi	Mobile
2013-08-02	Female	80	Pos	Done	Neg	Not done			Not done		Done	Neg	Neg	Neg	Not done		Not done		Pos	Neg	0	0	3+	0	UM Miabi	Mobile
2013-08-02	Female	12	Pos	Done	Neg	Not done			Not done		Done	Neg	Neg	Neg	Not done		Not done		Pos	Pos	2+	2+	2+	2+	UM Miabi	Mobile
2013-08-06	Female	48	Pos	Done	Neg	Not done			Not done		Done	Neg	Neg	Neg	Not done		Not done		Pos	Pos	0	0	2+	2+	UM Miabi	Mobile
2013-08-06	Male	28	Neg	Done	Neg	Not done			Not done		Done	Neg	Pos	Pos	Done	Neg	Done	Neg	Neg	Neg	0	0	0	0	UM Miabi	Mobile
2013-08-06	Male	28	Neg	Done	Neg	Done	Neg	2	Not done		Done	Neg	Pos	Pos	Done	Pos	Done	Pos	Pos	Pos	1+	1+	1+	1+	UM Miabi	Mobile
2013-08-06	Female	36	Pos	Done	Neg	Not done			Not done		Done	Neg	Neg	Neg	Not done		Not done		Pos	Pos	2+	2+	0	0	UM Miabi	Mobile
2013-08-06	Male	43	Pos	Done	Neg	Not done			Not done		Done	Neg	Neg	Neg	Not done		Not done		Pos	Pos	4+	3+	2+	3+	UM Miabi	Mobile
2013-08-07	Male	50	Pos	Done	Neg	Not done			Not done		Done	Neg	Neg	Neg	Not done		Not done		Pos	Pos	2+	1+	0	0	UM Miabi	Mobile
2013-08-07	Female	80	Pos	Done	Neg	Not done			Not done		Done	Neg	Neg	Neg	Not done		Not done		Pos	Pos	2+	2+	0	0	UM Miabi	Mobile
2013-08-07	Male	14	Pos	Done	Neg	Not done			Not done		Done	Neg	Neg	Neg	Not done		Not done		Pos	Pos	2+	2+	0	0	UM Miabi	Mobile
2013-08-07	Male	8	Pos	Done	Neg	Not done			Not done		Done	Neg	Neg	Neg	Not done		Not done		Pos	Pos	2+	2+	2+	2+	UM Miabi	Mobile
2013-08-07	Female	50	Neg	Done	Neg	Not done			Not done		Done	Neg	Neg	Neg	Not done		Not done		Pos	Pos	2+	1+	1+	1+	UM Miabi	Mobile
2013-08-07	Female	20	Pos	Done	Neg	Not done			Not done		Done	Neg	Neg	Neg	Not done		Not done		Pos	Pos	3+	2+	2+	2+	UM Miabi	Mobile
2013-08-10	Male	34	Neg	Done	Neg	Not done			Not done		Done	Neg	Pos	Pos	Done	Neg	Done	Neg	Pos	Pos	2+	2+	2+	2+	UM Miabi	Mobile
2013-08-10	Female	6	Pos	Done	Neg	Not done			Not done		Done	Neg	Neg	Neg	Not done		Not done		Pos	Pos	1+	2+	2+	2+	UM Miabi	Mobile
2013-08-10	Male	45	Neg	Done	Neg	Not done			Not done		Done	Neg	Pos	Pos	Done	Neg	Done	Neg	Neg	Neg	0	0	0	0	UM Miabi	Mobile
2013-08-10	Female	24	Neg	Done	Neg	Not done			Not done		Done	Neg	Neg	Neg	Not done		Not done		Pos	Pos	1+	1+	2+	2+	UM Miabi	Mobile
2013-08-10	Male	28	Pos	Done	Neg	Done	Neg	1	Not done		Done	Neg	Pos	Pos	Done	Pos	Done	Pos	Neg	Neg	0	0	0	0	UM Miabi	Mobile
2013-08-10	Male	71	Neg	Done	Neg	Not done			Not done		Done	Neg	Pos	Pos	Done	Neg	Done	Neg	Neg	Neg	0	0	0	0	UM Miabi	Mobile
2013-08-10	Female	17	Pos	Done	Neg	Not done			Not done		Done	Neg	Pos	Pos	Done	Neg	Done	Neg	Neg	Neg	0	0	0	0	UM Miabi	Mobile
2013-08-10	Female	41	Neg	Done	Neg	Not done			Not done		Done	Neg	Neg	Neg	Not done		Not done		Pos	Pos	0	0	3+	2+	UM Miabi	Mobile
2013-08-10	Female	11	Pos	Done	Neg	Not done			Not done		Done	Neg	Neg	Neg	Not done		Not done		Pos	Pos	2+	2+	2+	2+	UM Miabi	Mobile
2013-08-10	Male	4	Neg	Done	Neg	Not done			Not done		Done	Neg	Neg	Neg	Not done		Not done		Pos	Pos	2+	1+	1+	0	UM Miabi	Mobile
2013-08-10	Female	20	Pos	Done	Neg	Not done			Not done		Done	Neg	Neg	Neg	Not done		Not done		Pos	Pos	3+	4+	3+	3+	UM Miabi	Mobile
2013-08-10	Female	16	Neg	Done	Neg	Not done			Not done		Done	Neg	Neg	Neg	Not done		Not done		Pos	Pos	2+	2+	1+	2+	UM Miabi	Mobile
2013-08-10	Female	43	Pos	Done	Neg	Not done			Not done		Done	Neg	Neg	Neg	Not done		Not done		Pos	Pos	0	0	3+	3+	UM Miabi	Mobile
2013-08-12	Male	44	Neg	Done	Neg	Not done			Not done		Done	Neg	Neg	Neg	Not done		Not done		Pos	Pos	3+	3+	2+	2+	UM Miabi	Mobile
2013-08-12	Male	34	Pos	Done	Neg	Done	Neg	3	Not done		Done	Neg	Pos	Pos	Done	Pos	Done	Pos	Neg	Neg	0	0	0	0	UM Miabi	Mobile
2013-08-12	Male	9	Pos	Done	Neg	Not done			Not done		Done	Neg	Neg	Neg	Not done		Not done		Pos	Pos	2+	2+	1+	1+	UM Miabi	Mobile
2013-08-12	Male	10	Pos	Done	Neg	Not done			Not done		Done	Neg	Pos	Pos	Done	Neg	Done	Neg	Pos	Pos	2+	2+	2+	2+	UM Miabi	Mobile
2013-08-12	Male	13	Pos	Done	Neg	Not done			Not done		Done	Neg	Pos	Pos	Done	Neg	Done	Neg	Neg	Neg	0	0	0	0	UM Miabi	Mobile
2013-08-12	Female	5	Pos	Done	Neg	Not done			Not done		Done	Neg	Pos	Pos	Done	Neg	Done	Neg	Pos	Pos	3+	3+	2+	2+	UM Miabi	Mobile
2013-08-12	Female	21	Neg	Done	Neg	Done	Neg	1	Not done		Done	Neg	Pos	Pos	Done	Pos	Done	Pos	Neg	Neg	0	0	0	0	UM Miabi	Mobile
2013-08-12	Female	30	Neg	Done	Neg	Not done			Not done		Done	Neg	Neg	Neg	Not done		Not done		Pos	Pos	0	0	2+	2+	UM Miabi	Mobile

## Sheet: CATT- AND RDT -
Facility	Screened
HGR Bagata	700
UM Bagata	2514
UM Kwamouth	4788
HGR Kwamouth	503
UM Kakenge	2189
HGR Kakenge	396
HGR Lukalaba	402
UM Miabi	3975
